# Supplementary material for: Regulation of the linear ubiquitination of STAT1 controls antiviral interferon signaling
Source: PubMed Central journal article supplement (PMC7052135; doi:10.1038/s41467-020-14948-z), 2020-03-02

## **Supplementary Information**

### **Regulation of the linear ubiquitination of STAT1 controls antiviral interferon signaling**

Zuo et al.

# Supplementary Figure 1

**a**

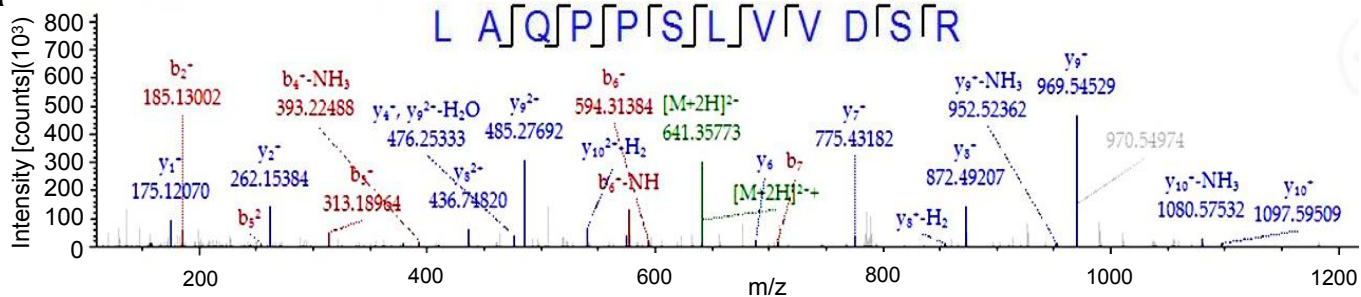

**b**

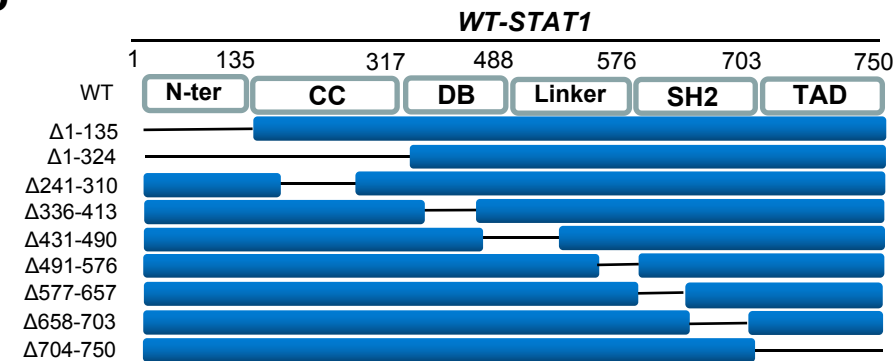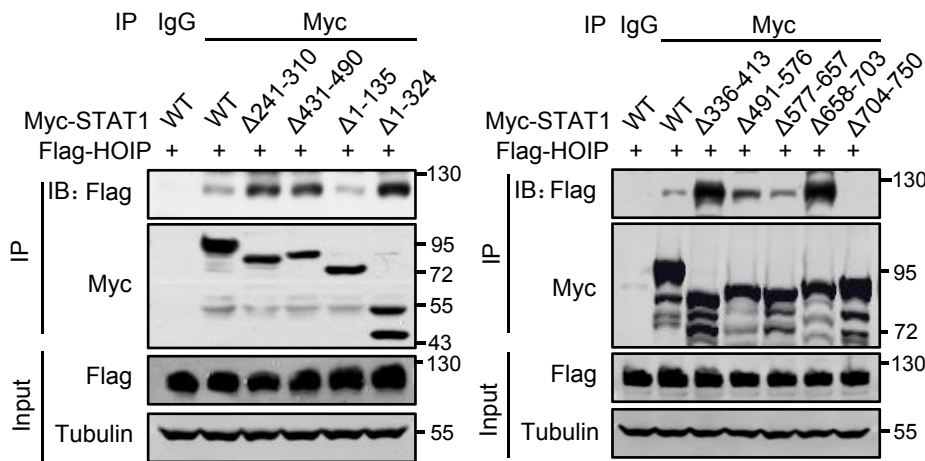

**c**

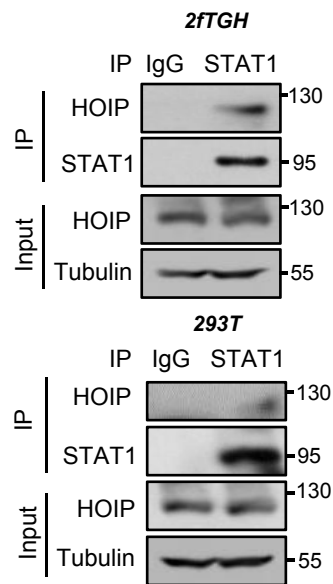

**d**

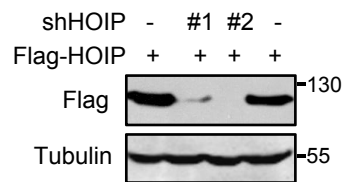

**e**

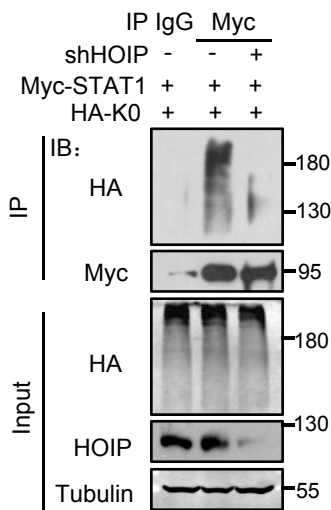

**f**

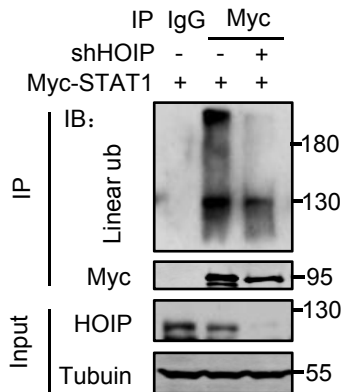

**g**

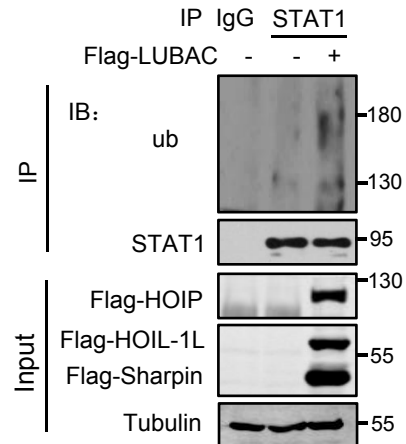

## Supplementary Figure 1

### **STAT1 has linear ubiquitination mediated by HOIP.**

**(a)** Mass spectrometry analysis of the HOIP protein interacting with STAT1. **(b)** Immunoprecipitation (IP) and immunoblotting (IB) analysis of the interaction between Flag-HOIP and Myc-STAT1(WT) or its different deletion mutants ( $\Delta$ 1-135,  $\Delta$ 1-324,  $\Delta$ 241-310,  $\Delta$ 336-413,  $\Delta$ 431-490,  $\Delta$ 491-576,  $\Delta$ 577-657,  $\Delta$ 658-703,  $\Delta$ 704-750) in HEK293T cells. **(c)** Immunoprecipitation analysis of the interaction between endogenous HOIP and STAT1 in 2fTGH and HEK293T cells. **(d)** Western blot analysis of Flag-HOIP protein levels in HEK293T cells cotransfected with shHOIP (#1, #2) and Flag-HOIP. **(e)** Immunoprecipitation analysis of ubiquitination of STAT1 in HEK293T cells cotransfected with Myc-STAT1, shHOIP and HA-Ub-K0 (HA-K0, all lysines on Ub are mutated to arginine). **(f)** Immunoprecipitation analysis of linear ubiquitination of STAT1 in HEK293T cells cotransfected with shHOIP and Myc-STAT1. **(g)** Immunoprecipitation analysis of ubiquitination of STAT1 in HEK293T cells transfected with or without Flag-LUBAC. Data are representative of three independent experiments **(b-g)**.

# Supplementary Figure 2

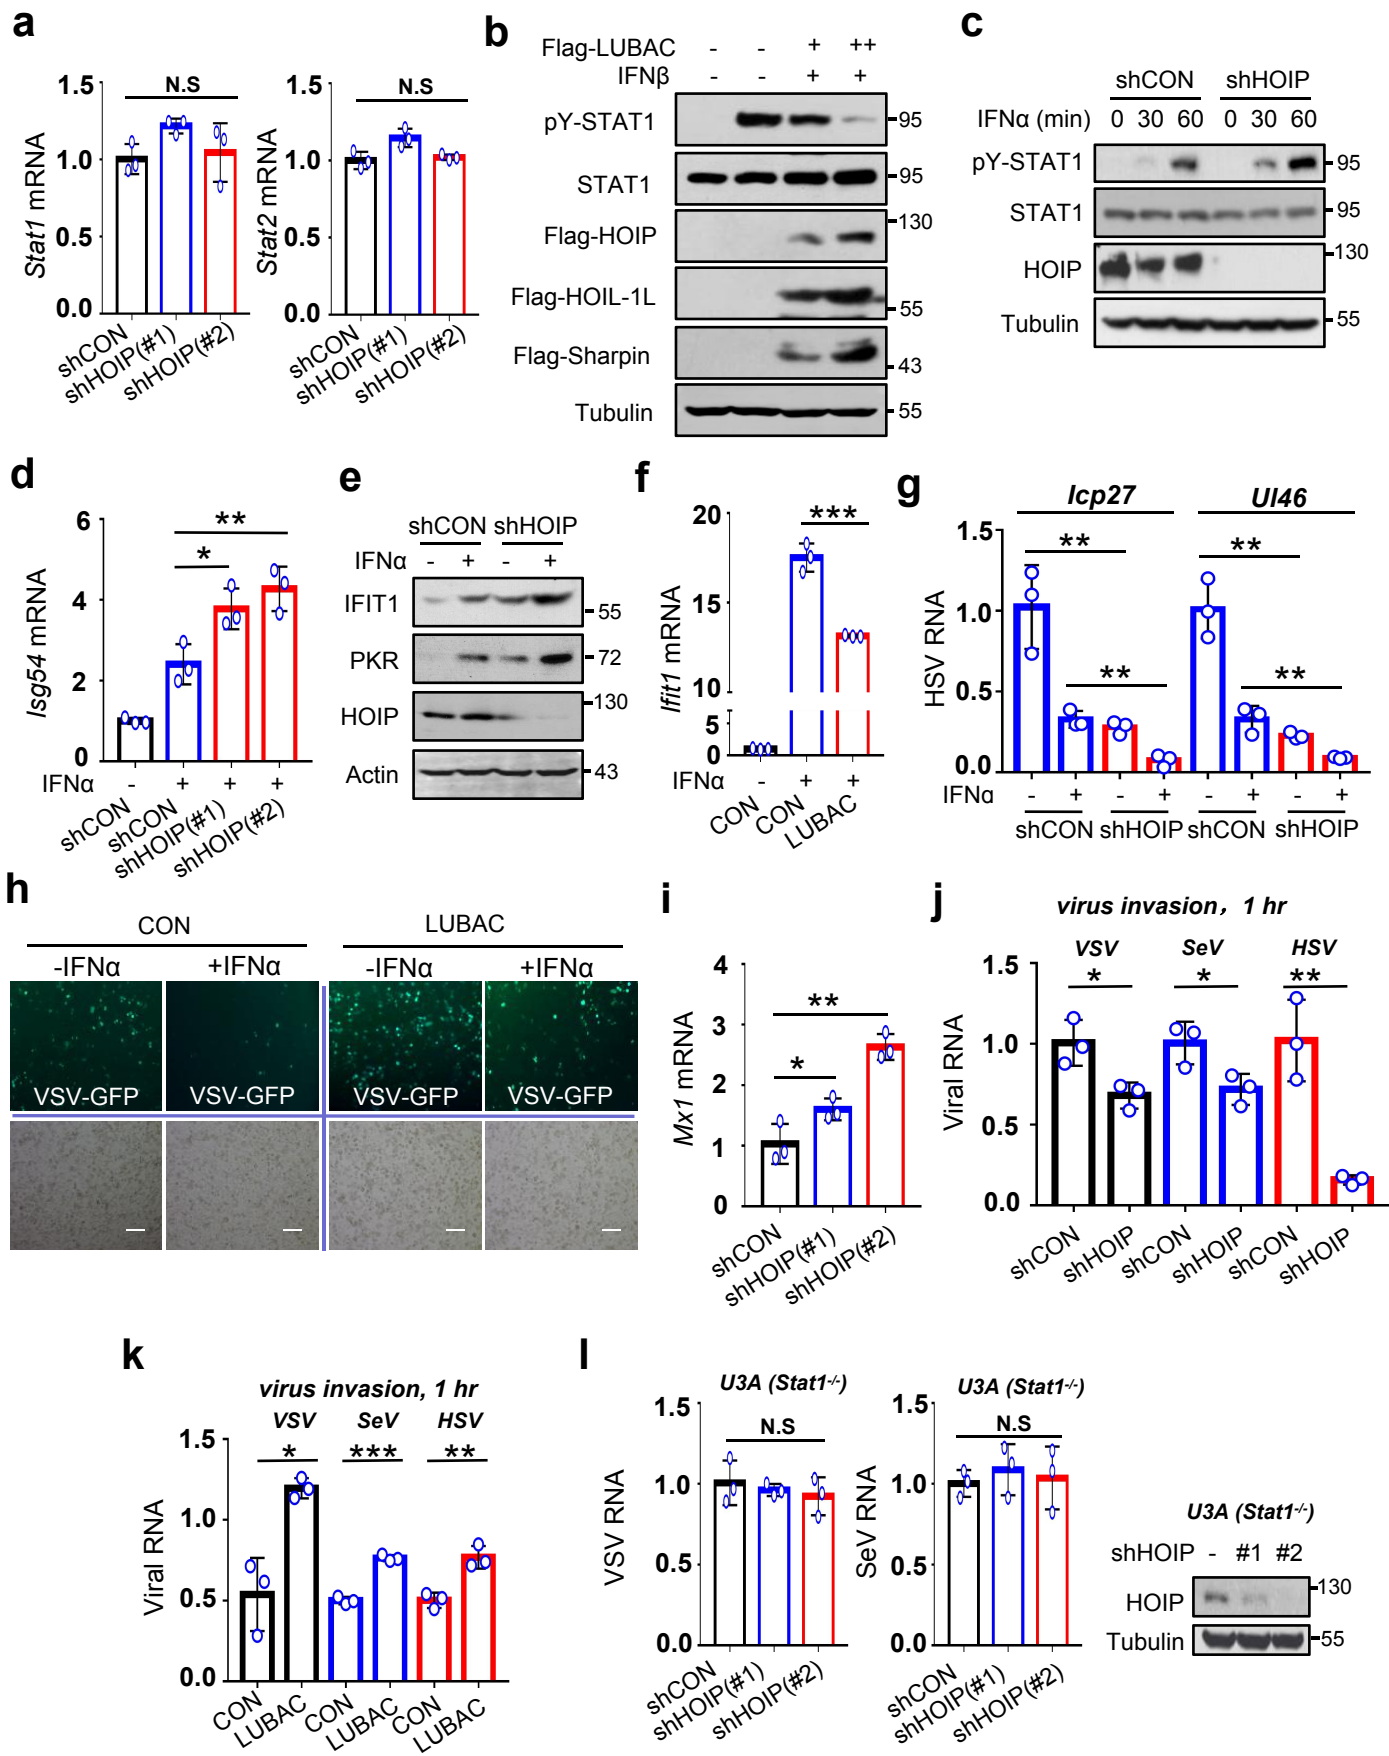

## Supplementary Figure 2

### Linear ubiquitination sustains STAT1 signaling homeostasis.

**(a)** RT-qPCR analysis of *Stat1* and *Stat2* mRNA in HEK293T cells transfected with control shRNAs (shCON) or shHOIP (#1, #2). **(b)** Western blot analysis of pY701-STAT1 (pY-STAT1) levels in HEK293T cells transfected with increasing amounts of Flag-LUBAC, and then treated with IFN $\beta$  (1,000 IU/ml) for 30 min. **(c)** Western blot analysis of pY-STAT1 in HeLa cells transfected with shHOIP and then treated with IFN $\alpha$  (1,000 IU/ml) for the indicated times. **(d)** RT-qPCR analysis of *Isg54* mRNA in HEK293T cells transfected with either shCON or shHOIP (#1, #2) and then stimulated with IFN $\alpha$  (1,000 IU/ml) for 4 hrs. **(e)** Western blot analysis of the representative ISGs proteins (IFIT1 and PKR) in HEK293T cells transfected with shHOIP and then treated with IFN $\alpha$  (500 IU/ml) for 24 hrs. **(f)** RT-qPCR analysis of *Ifit1* mRNA in HEK293T cells transfected with vectors (CON) or LUBAC-expressing constructs and then stimulated with IFN $\alpha$  (1,000 IU/ml) for 4 hrs. **(g)** RT-qPCR analysis of HSV viral *Icp27* and *Ul46* RNA in 2fTGH cells transfected with shHOIP and then treated with IFN $\alpha$  (60 IU/ml) for 20 hrs, followed by infection with HSV (MOI=1.0) for 24 hrs. **(h)** Fluorescence microscopy of VSV-GFP in A549 cells transfected with empty vectors (CON) or Flag-LUBAC and then infected by VSV-GFP (MOI=0.1) for 24 hrs. Scale bar: 100  $\mu$ m. **(i)** RT-qPCR analysis of a representative ISG (*Mx1*) mRNA in HEK293T cells transfected with shHOIP (#1, #2). **(j, k)** RT-qPCR analysis of viral RNA in 2fTGH cells transfected with either shHOIP **(j)** or Flag-LUBAC **(k)** and then infected by VSV (MOI=0.1), SeV (MOI=1.0) or HSV (MOI=1.0) for 1 hr to observe virus invasion. **(l)** RT-qPCR analysis of viral RNA in U3A cells transfected with shHOIP (#1, #2) and then infected by VSV (MOI=0.1) or SeV (MOI=1.0) for 1 hr. HOIP knockdown was analyzed by Western blot. N.S, not significant ( $p>0.05$ ) and  $*p<0.05$ ,  $**p<0.01$ ,  $***p<0.001$  (two-tailed unpaired Student's *t*-test). Data are shown as mean and s.d. of three biological replicates **(a, d, f, g, i-l)**, or are representative of three independent experiments **(b, c, e, h)**.

# Supplementary Figure 3

**a**

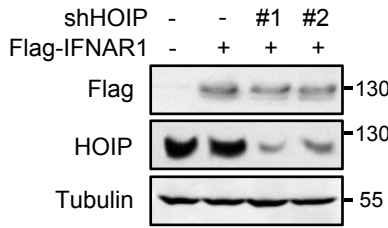

**b**

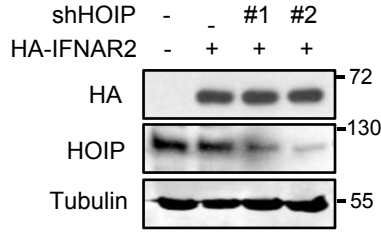

**c**

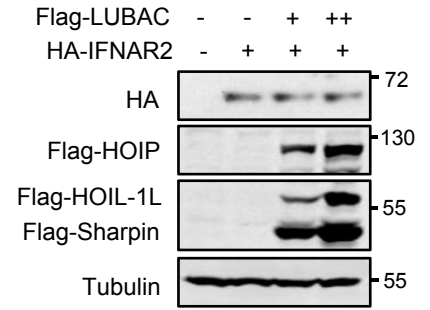

**d**

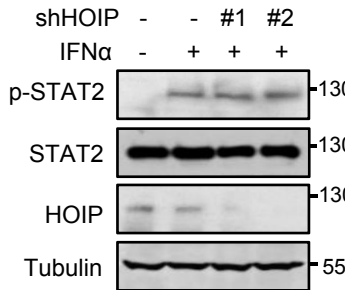

**e**

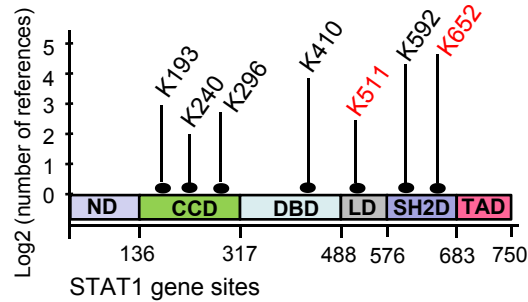

**f**

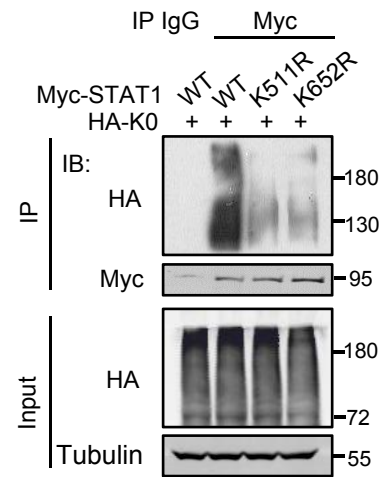

**g**

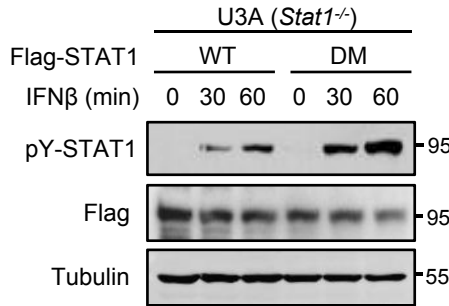

**h**

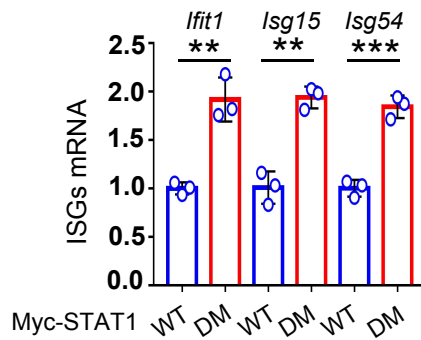

**i**

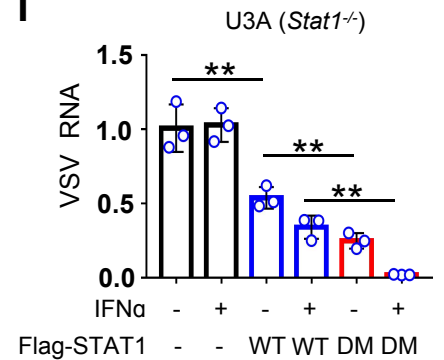

**j**

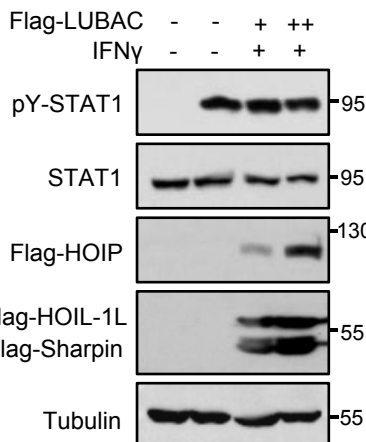

**k**

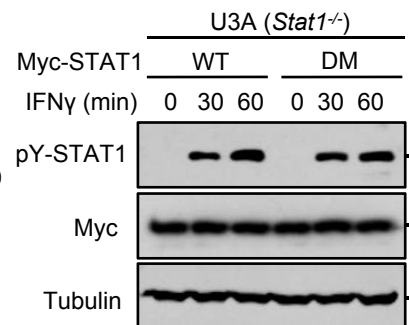

**l**

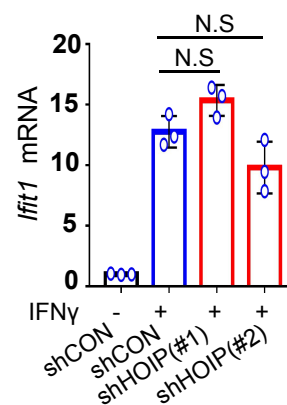

**m**

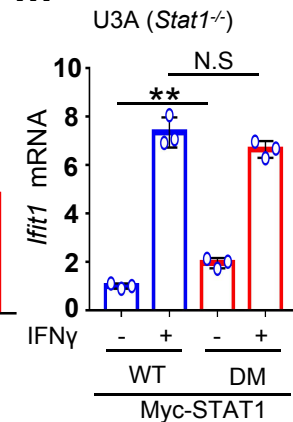

### Supplementary Figure 3

#### LUBAC induces STAT1 linear ubiquitination at Lys511/652.

**(a)** Western blot analysis of Flag-IFNAR1 levels in HEK293T cells cotransfected with Flag-IFNAR1, together with shCON (-) or shHOIP (#1, #2). **(b,c)** Western blot analysis of HA-IFNAR2 levels in HEK293T cells cotransfected with HA-IFNAR2 and either shHOIP (#1, #2) **(b)** or increasing amounts of Flag-LUBAC **(c)**. **(d)** Western blot analysis of p-STAT2 in HEK293T cells transfected with shHOIP (#1, #2) and then treated with IFN $\alpha$  (1,000 IU/ml) for 30 min. **(e)** Putative ubiquitination sites of STAT1 obtained from the PhosphoSitePlus database. **(f)** Immunoprecipitation analysis of ubiquitination of Myc-STAT1 (WT, K511R, or K652R) in HeLa cells cotransfected with Myc-STAT1 (WT, K511R or K652R) and HA-K0 using a HA antibody. **(g)** Western blot analysis of pY-STAT1 in U3A cells transfected Flag-STAT1 (WT or DM) and then treated with IFN $\beta$  (1,000 IU/ml) as indicated. **(h)** RT-qPCR analysis of the representative ISGs (*Ifit1*, *Isg15* and *Isg54*) mRNA in U3A cells transfected with Myc-STAT1 (WT or DM). **(i)** RT-qPCR analysis of VSV viral RNA in U3A cells transfected with Flag-STAT1 (WT or DM) and then treated with IFN $\alpha$  (60 IU/ml) for 20 hrs, followed by infection with VSV (MOI=0.1) for 24 hrs. **(j)** Western blot analysis of pY-STAT1 levels in HEK293T cells transfected with increasing amounts of Flag-LUBAC, and then treated with IFN $\gamma$  (1,000 IU/ml) for 30 min. **(k)** Western blot analysis of pY-STAT1 in U3A cells transfected Myc-STAT1 (WT or DM) and then treated with IFN $\gamma$  (1,000 IU/ml) as indicated. **(l)** RT-qPCR analysis of the representative ISG (*Ifit1*) mRNA in HEK293T cells transfected with shHOIP (#1, #2) and then stimulated with IFN $\gamma$  (1,000 IU/ml) for 4 hrs. **(m)** RT-qPCR analysis of the representative ISG (*Ifit1*) mRNA in U3A cells transfected with Myc-STAT1 (WT or DM) and then treated with IFN $\gamma$  (1,000 IU/ml) for 4 hrs. N.S, not significant ( $p>0.05$ ), \*\* $p<0.01$  and \*\*\* $p<0.001$  (two-tailed unpaired Student's  $t$ -test). Data are shown as mean and s.d. of three biological replicates **(h, i, l, m)**, or are representative of three independent experiments **(a-d, f, g, j, k)**.

# Supplementary Figure 4

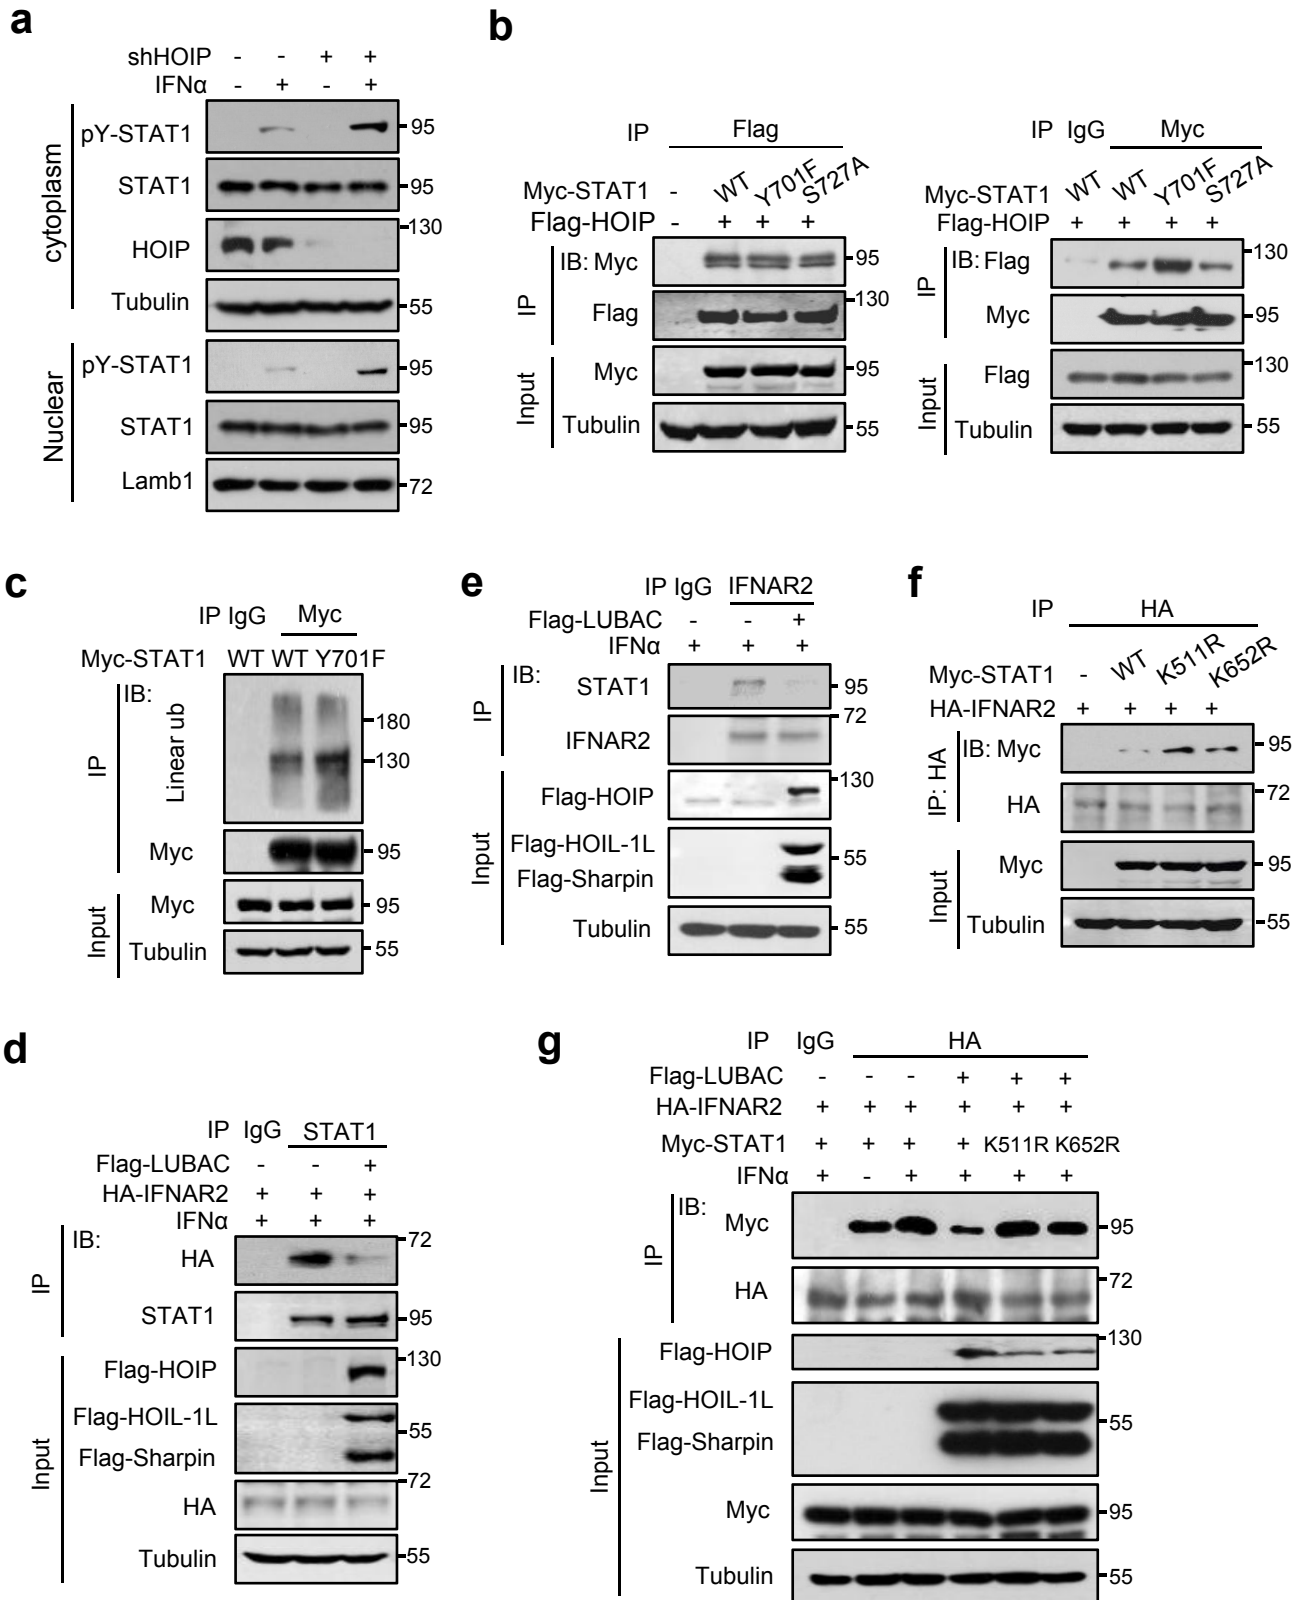



## Supplementary Figure 4

### **Linear ubiquitination blocks the binding of STAT1 to IFNAR2.**

**(a)** Western blot analysis of pY701-STAT1 (pY-STAT1) in the cytoplasm and nucleus of HEK293T cells transfected with shHOIP and then treated with IFN $\alpha$  (1,000 IU/ml) for 30 min. **(b)** Immunoprecipitation analysis of the interaction between Flag-HOIP and Myc-STAT1 (WT, Y701F or S727A) in HEK293T cells. **(c)** Immunoprecipitation analysis of linear ubiquitination of Myc-STAT1 (WT or Y701F) in HEK293T cells transfected with Myc-STAT1 (WT or Y701F). **(d)** Immunoprecipitation analysis of the interaction between HA-IFNAR2 and STAT1 in HEK293T cells transfected with Flag-LUBAC and then treated with IFN $\alpha$  (1,000 IU/ml) for 15 min. **(e)** Immunoprecipitation analysis of the interaction between endogenous IFNAR2 and STAT1 in HEK293T cells treated as **(d)**. **(f)** Immunoprecipitation analysis of the interaction between HA-IFNAR2 and Myc-STAT1 (WT or its mutants) in HEK293T cells cotransfected with HA-IFNAR2 and Myc-STAT1 (WT, K511R or K652R). **(g)** Immunoprecipitation analysis of the interaction between HA-IFNAR2 and Myc-STAT1 (WT and its mutants) in HEK293T cells cotransfected with HA-IFNAR2, Flag-LUBAC and Myc-STAT1 (WT, K511R or K652R) and then treated with IFN $\alpha$  (1,000 IU/ml) for 15 min. Data are representative of three independent experiments.

# Supplementary Figure 5

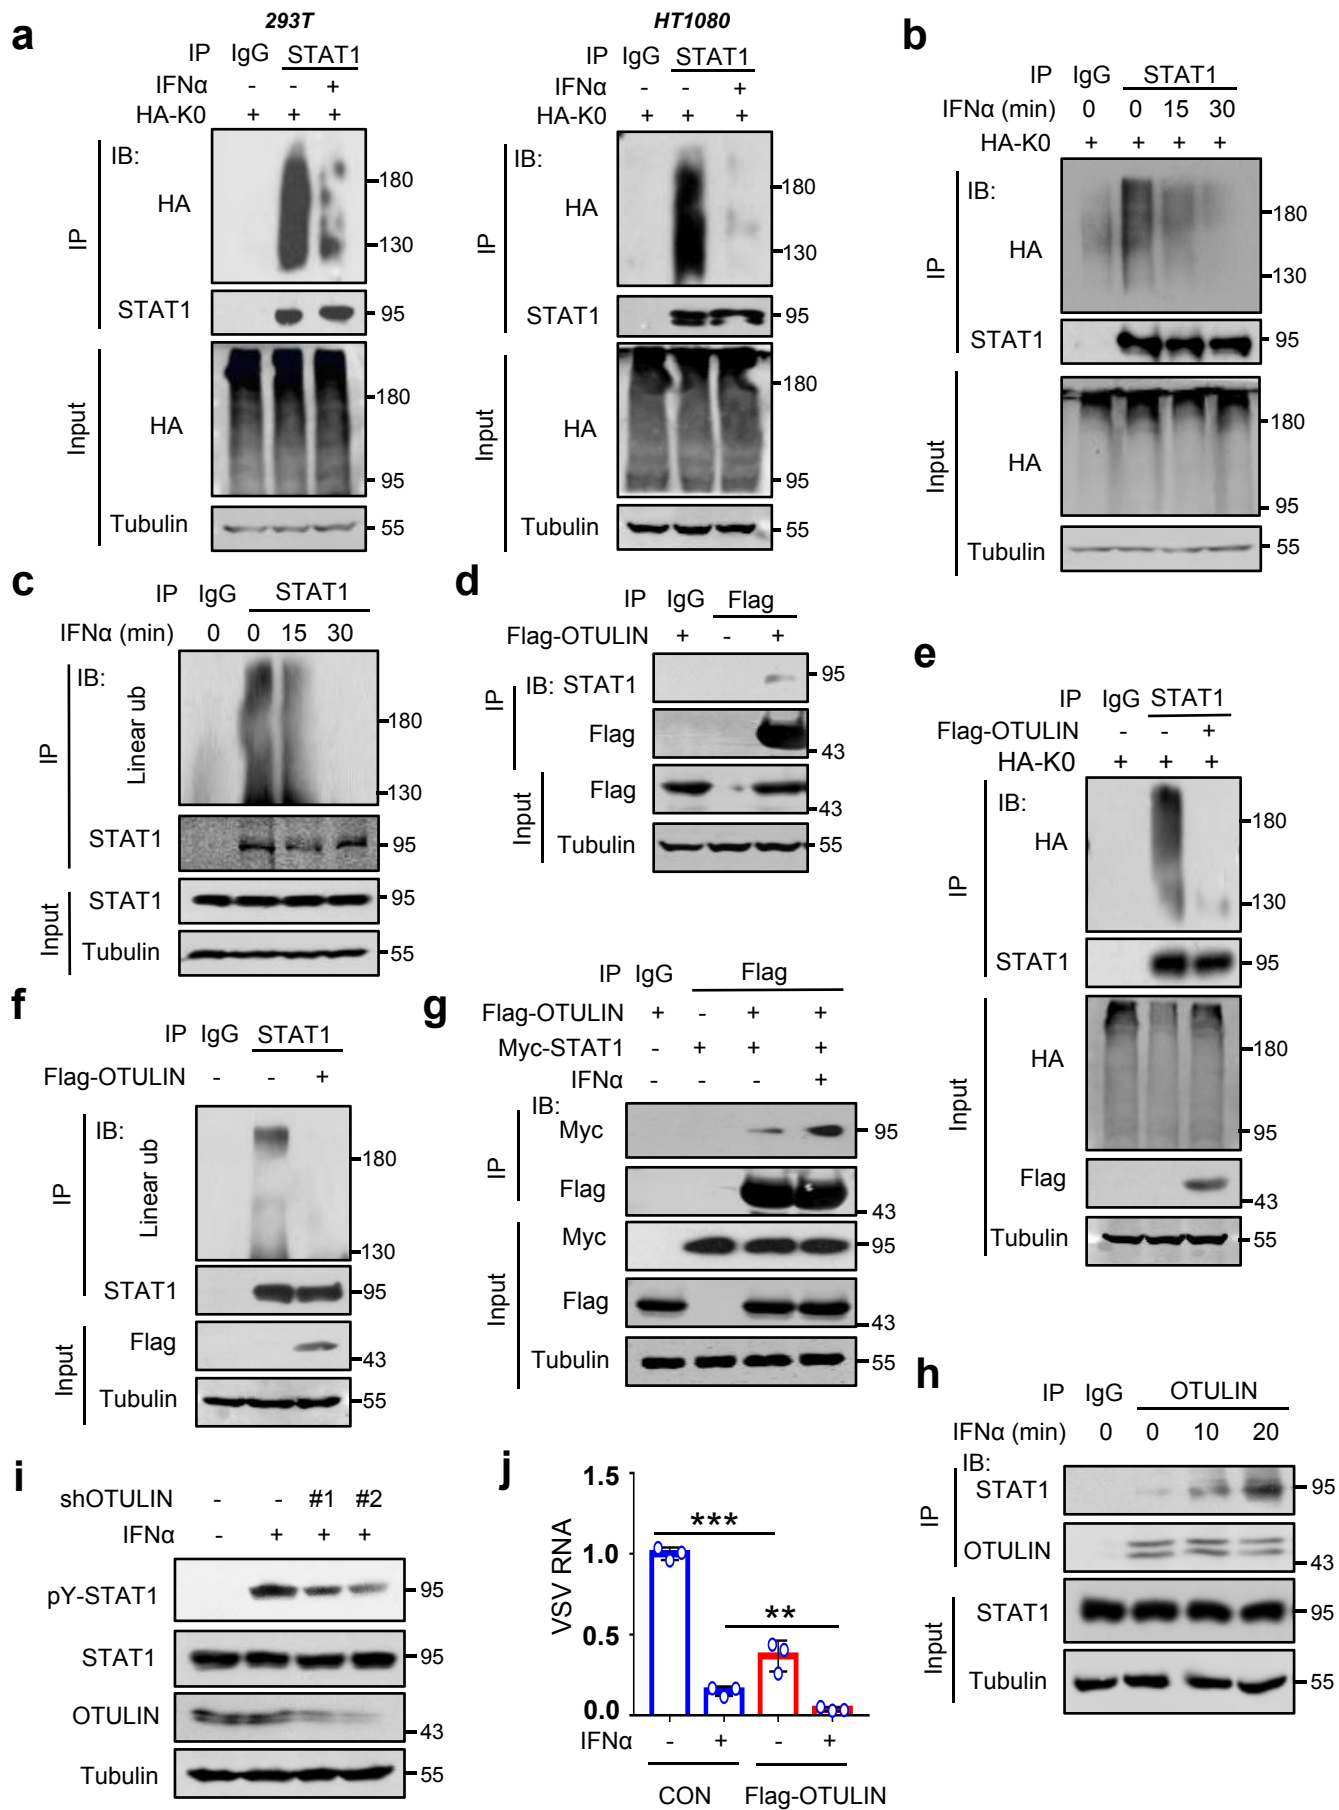

## Supplementary Figure 5

### **IFN-I removes STAT1 linear ubiquitination via OTULIN.**

**(a)** Immunoprecipitation analysis of ubiquitination of STAT1 in HEK293T (left) or HT1080 (right) cells transfected with HA-K0 and then treated with IFN $\alpha$  (1,000 IU/ml) for 30 min. **(b)** Immunoprecipitation analysis of ubiquitination of STAT1 in 2fTGH cells transfected with HA-K0 and then treated with IFN $\alpha$  (1,000 IU/ml) for the indicated times. **(c)** Immunoprecipitation analysis of linear ubiquitination of STAT1 in HEK293T cells treated with IFN $\alpha$  (1,000 IU/ml) as indicated. **(d)** Immunoprecipitation analysis of the interaction between Flag-OTULIN and STAT1 in HEK293T cells transfected with Flag-OTULIN. **(e)** Immunoprecipitation analysis of ubiquitination of STAT1 in HEK293T cells cotransfected with HA-K0 and Flag-OTULIN using a HA antibody. **(f)** Immunoprecipitation analysis of linear ubiquitination of STAT1 transfected with Flag-OTULIN using a linear ubiquitination antibody. **(g)** Immunoprecipitation analysis of the interaction between Flag-OTULIN and Myc-STAT1 in HEK293T cells transfected with Flag-OTULIN and Myc-STAT1 and then treated with IFN $\alpha$  (1,000 IU/ml) for 15 min. **(h)** Immunoprecipitation analysis of the interaction between endogenous OTULIN and STAT1 in HEK293T cells treated with IFN $\alpha$  (1,000 IU/ml) for the indicated times. **(i)** Western blot analysis of pY-STAT1 in HEK293T cells transfected with shOTULIN (#1, #2) and then treated with IFN $\alpha$  (1,000 IU/ml) for 30 min. **(j)** RT-qPCR analysis of VSV viral RNA in 2fTGH cells transfected with Flag-OTULIN and then stimulated with IFN $\alpha$  (60 IU/ml) for 20 hrs, followed by infection with VSV (MOI=0.1) for 24 hrs. \*\* $p$ <0.01 and \*\*\* $p$ <0.001 (two-tailed unpaired Student's  $t$ -test). Data are shown as mean and s.d. of three biological replicates **(j)**, or are representative of three independent experiments **(a-i)**.

# Supplementary Figure 6

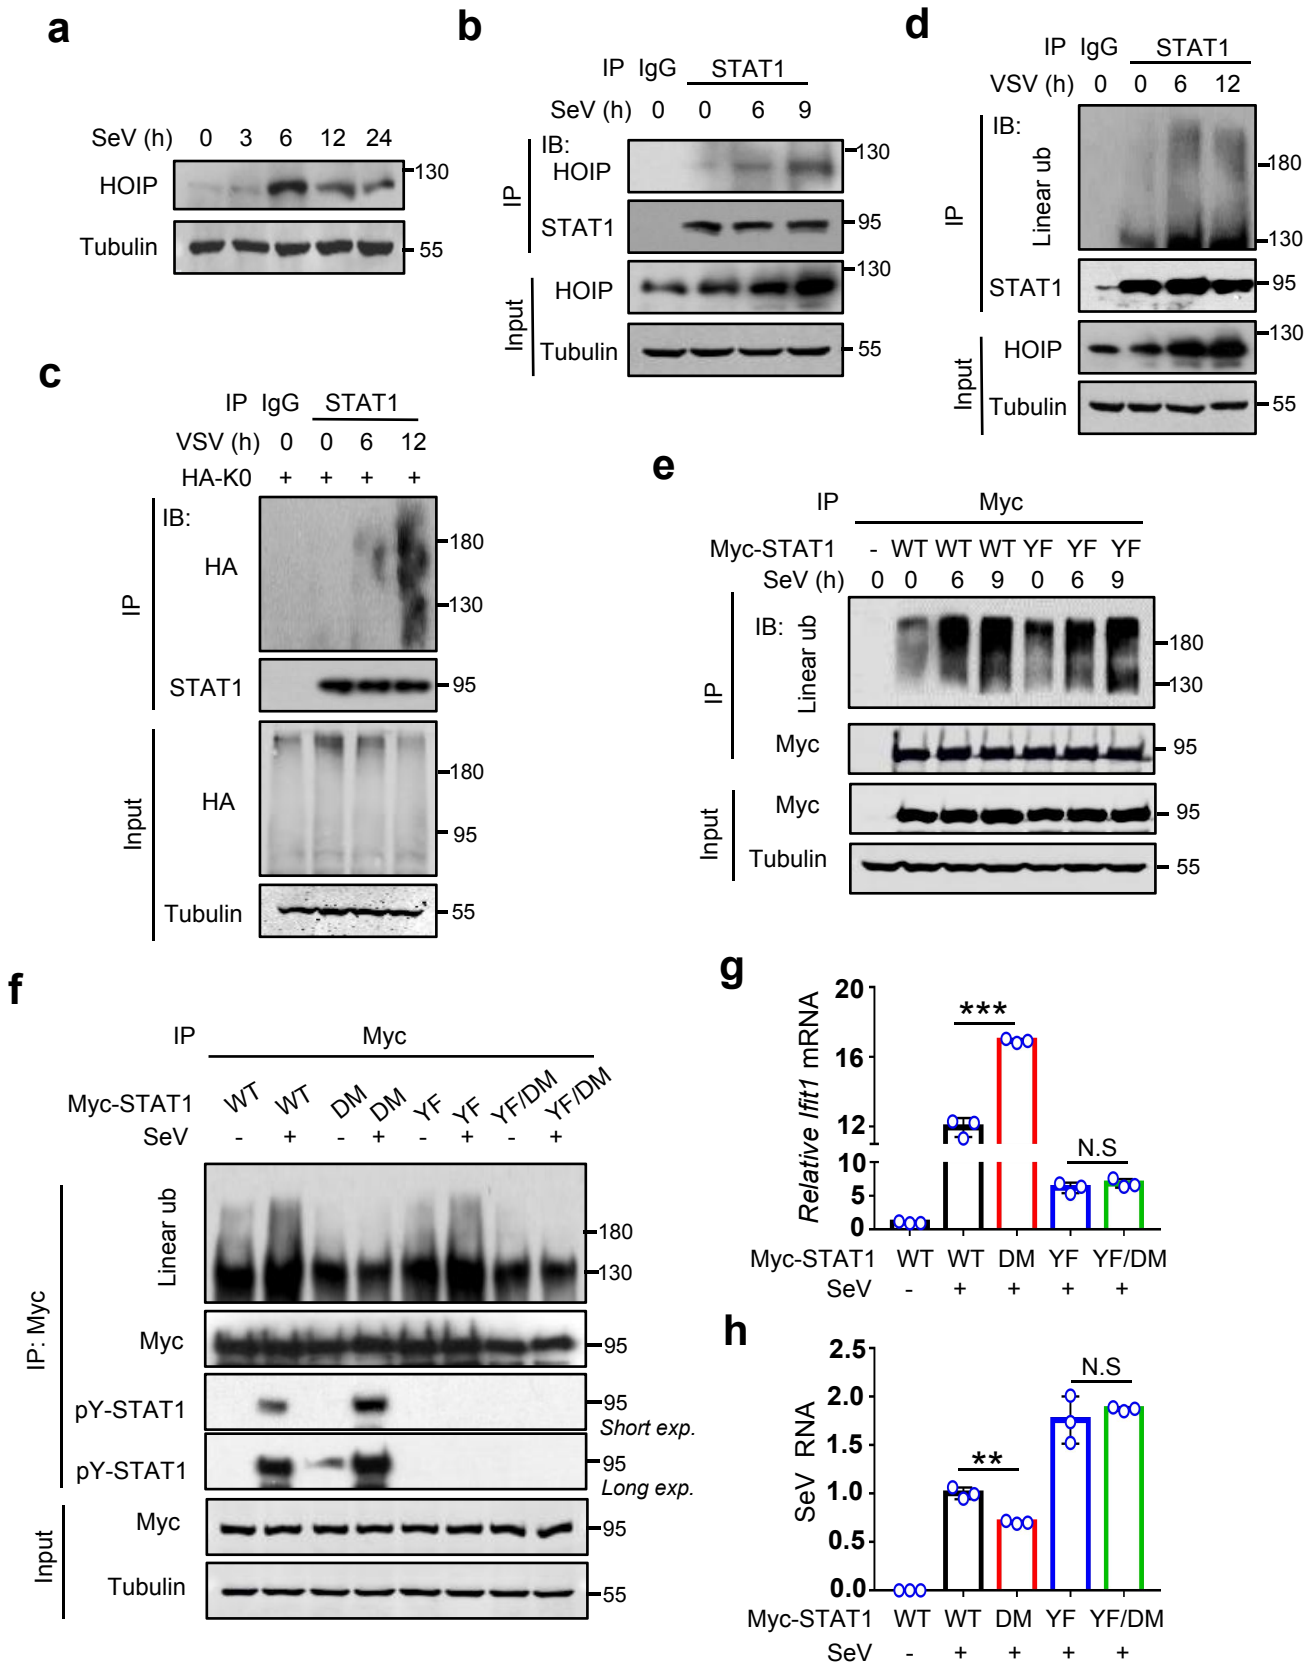

## Supplementary Figure 6

### Viruses upregulate HOIP and STAT1 linear ubiquitination.

**(a)** Western blot analysis of HOIP proteins in A549 cells infected with SeV (MOI=1.0) for the indicated times. **(b)** Immunoprecipitation analysis of the interaction between HOIP and STAT1 in HEK293T cells infected with SeV (MOI=1.0) for the indicated times. **(c)** Immunoprecipitation analysis of ubiquitination of STAT1 in HT1080 cells infected with HA-K0 and then infected with VSV (MOI=0.5) as indicated. **(d)** Immunoprecipitation analysis of linear ubiquitination of STAT1 in A549 cells infected with VSV (MOI=0.5) for the indicated times. **(e)** Immunoprecipitation analysis of linear ubiquitination of STAT1 in HEK293T cells transfected with Myc-STAT1 (WT or YF) and then infected with SeV (MOI=1.0) as indicated. **(f)** Immunoprecipitation analysis of linear ubiquitination of STAT1 in U3A cells transfected with Myc-STAT1 (WT, DM, YF or YF/DM) and then infected with SeV (MOI=1.0) for 12 hrs. **(g)** RT-qPCR analysis of the representative ISG (*Ifit1*) mRNA in U3A cells transfected with Myc-STAT1 (WT, DM, YF or YF/DM) and then infected with SeV (MOI=1.0) for 12 hrs. **(h)** RT-qPCR analysis of SeV viral RNA in U3A cells transfected with Myc-STAT1 (WT, DM, YF or YF/DM) and then infected with SeV (MOI=1) for 12 hrs. N.S, not significant ( $p>0.05$ ),  $**p<0.01$  and  $***p<0.001$  (two-tailed unpaired Student's *t*-test). Data are representative of three independent experiments **(a-f)**, or are shown as mean and s.d. of three biological replicates **(g, h)**.

# Supplementary Figure 7

**a**

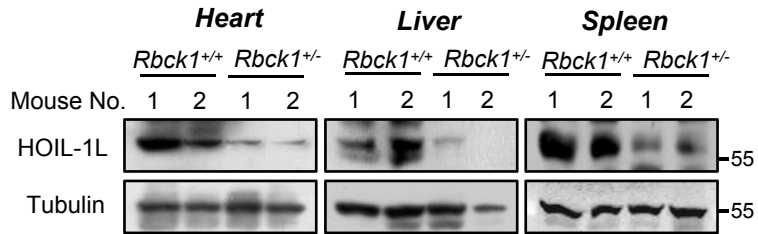

**b**

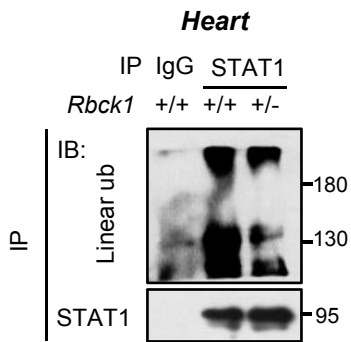

**c**

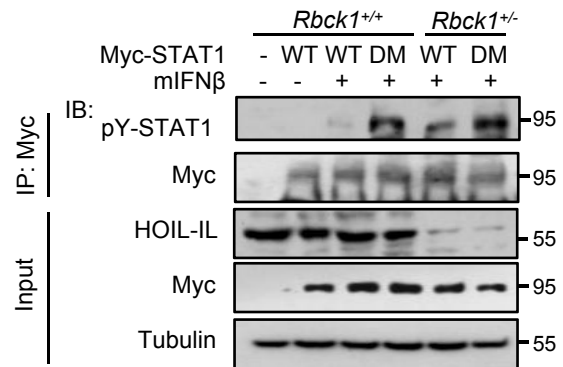

**d**

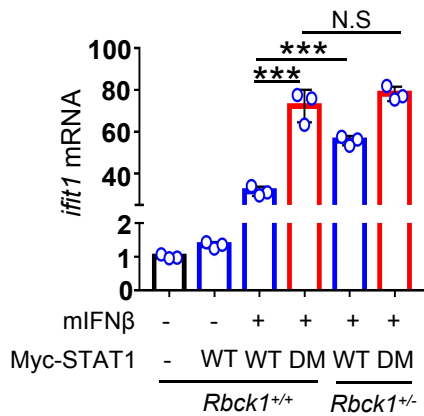

**e**

Lentiviral packaging GFP-STAT1

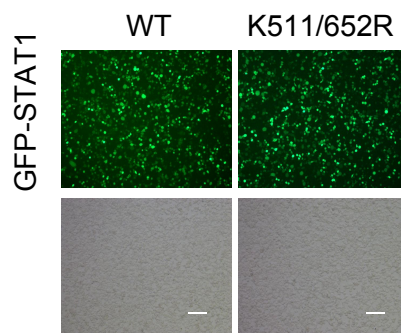

## Supplementary Figure 7

### HOIL-1L deficiency enhances IFN-I antiviral activity.

**(a)** Western blot analysis of HOIL-1L proteins in the heart, liver and spleen tissues from *Rbck1*<sup>+/+</sup> or *Rbck1*<sup>+/-</sup> mice. **(b)** Immunoprecipitation analysis of linear ubiquitination of STAT1 in the heart tissues from *Rbck1*<sup>+/+</sup> or *Rbck1*<sup>+/-</sup> mice. **(c)** Immunoprecipitation analysis of pY-STAT1 in *Rbck1*<sup>+/+</sup> or *Rbck1*<sup>+/-</sup> MEF cells transfected with Myc-STAT1 (WT or DM) and then treated with mIFN $\beta$  (1,000 IU/ml) as indicated. **(d)** RT-qPCR analysis of the representative ISG (*Ifit1*) mRNA in *Rbck1*<sup>+/+</sup> or *Rbck1*<sup>+/-</sup> MEF cells transfected with Myc-STAT1 (WT or DM) and then treated with mIFN $\beta$  (1,000 IU/ml) for 4 hrs. **(e)** The lentiviruses containing GFP-STAT1 (WT or K511/652R) were made in HEK293T cells. GFP signaling in cells was observed by the fluorescence microscopy. Scale bar: 100  $\mu$ m. N.S, not significant ( $p>0.05$ ) and \*\*\* $p<0.001$  (two-tailed unpaired Student's *t*-test). Data are shown as mean and s.d. of three biological replicates **(d)**, or are representative of three independent experiments **(a-c, e)**.

# Supplementary Figure 8: Original scans of immunoblots.

## For Figure 1

### Figure 1a

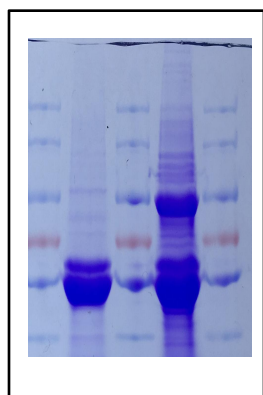

### Figure 1b

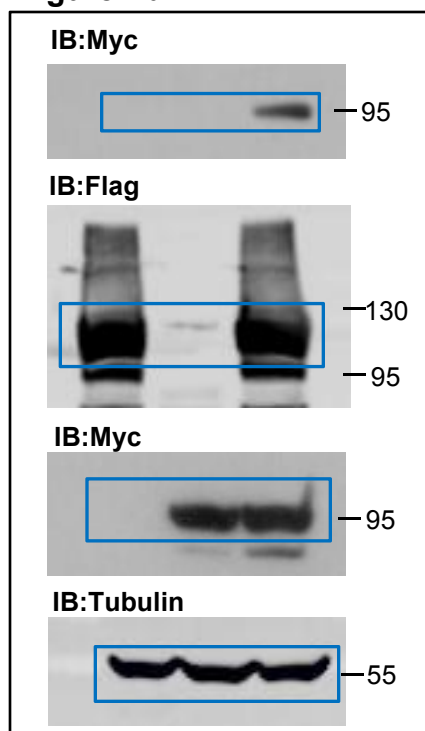

### Figure 1e

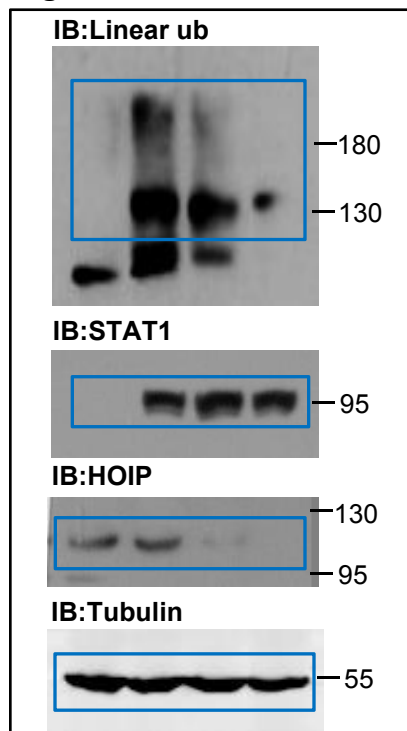

### Figure 1d

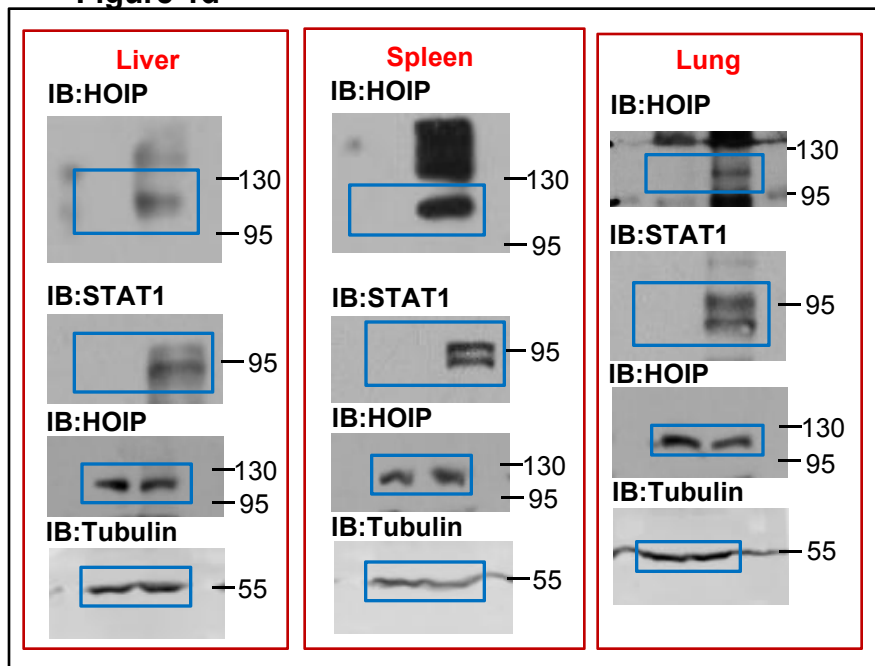

### Figure 1f

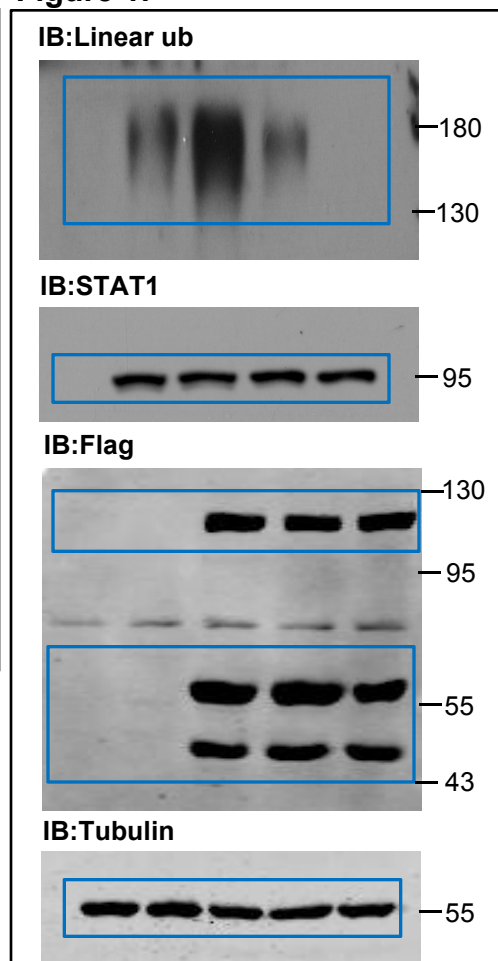

### Figure 1g

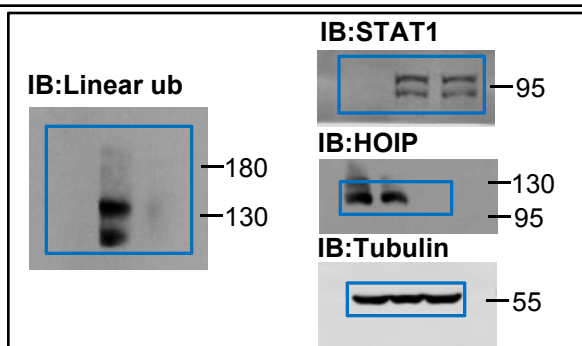



## For Figure 2

### Figure 2a

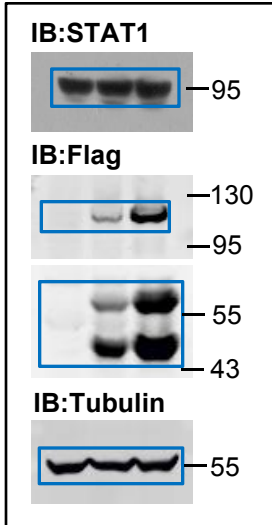

### Figure 2b

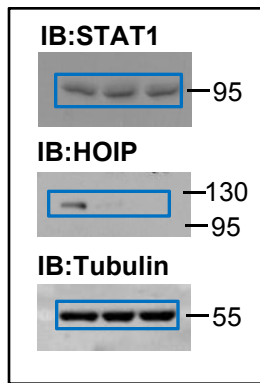

### Figure 2c

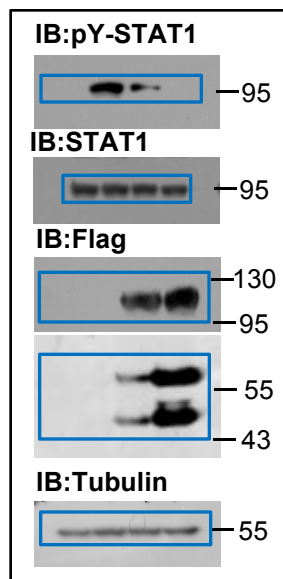

### Figure 2d

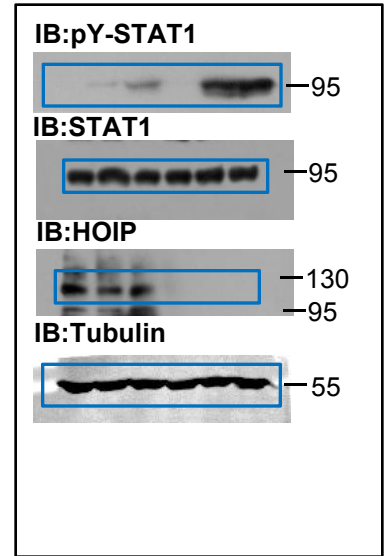

### Figure 2e

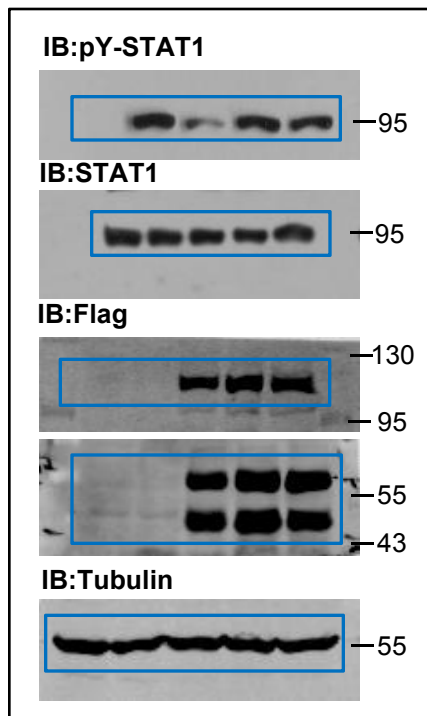

### Figure 2j

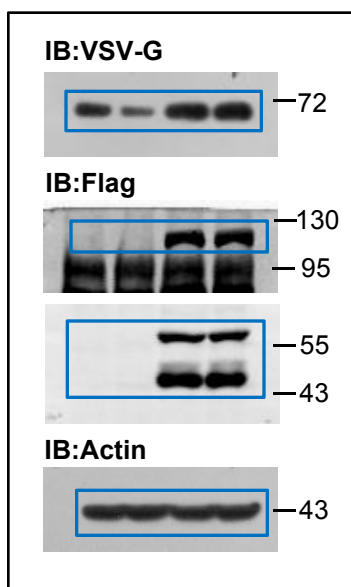

### Figure 2i

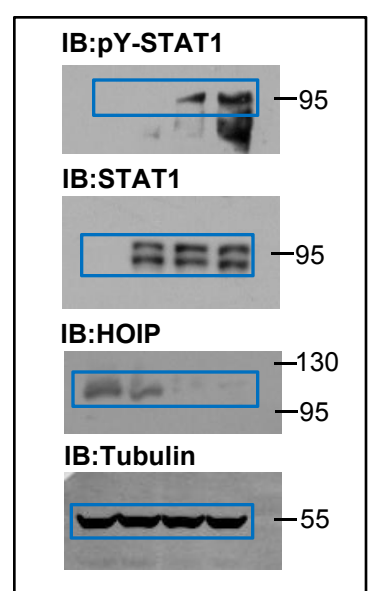

# For Figure 3

## Figure 3a

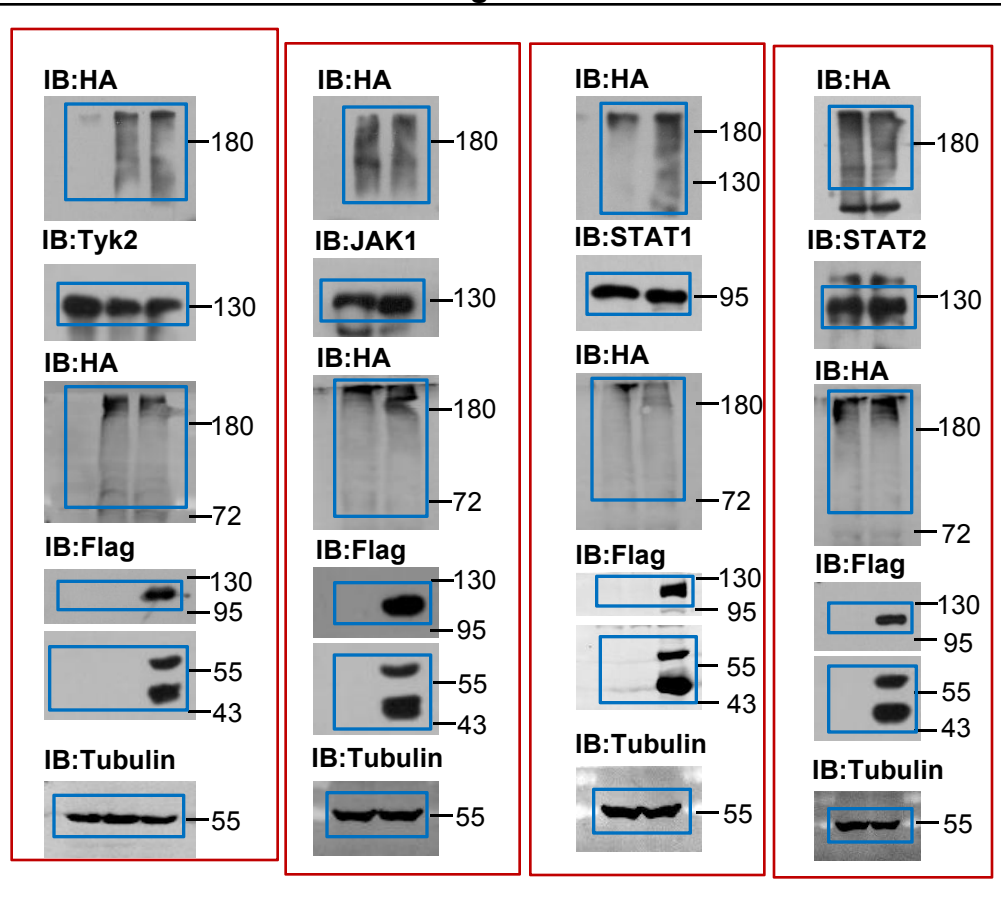

## Figure 3b

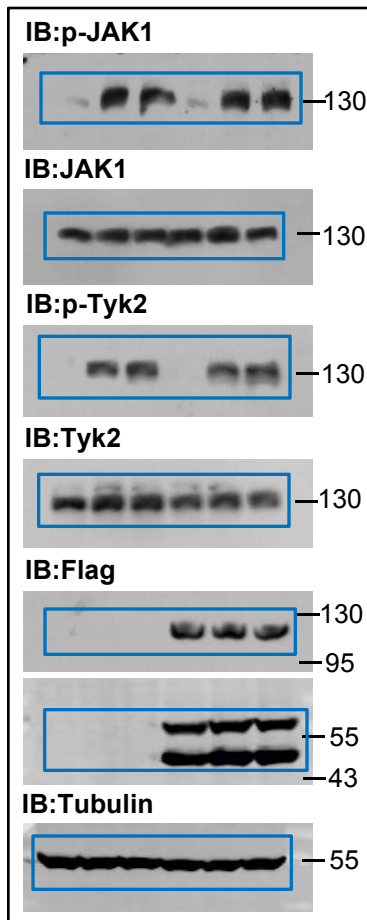

## Figure 3c

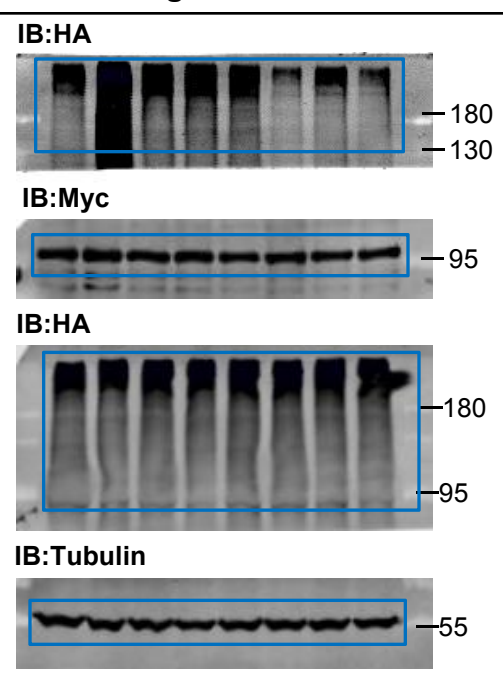

## Figure 3e

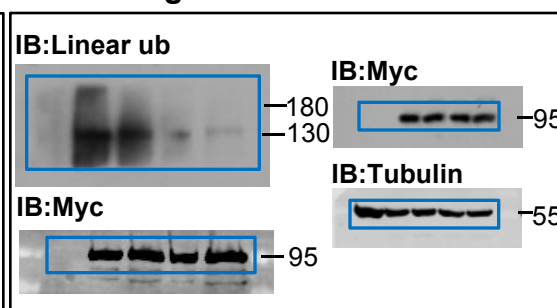

## Figure 3f

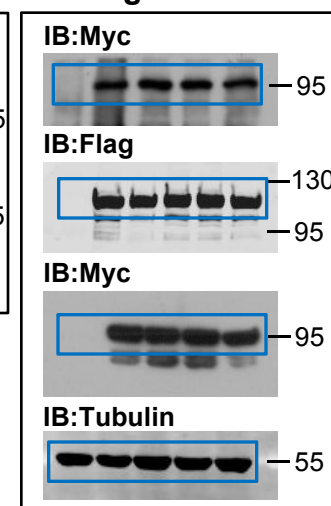

## Figure 3g

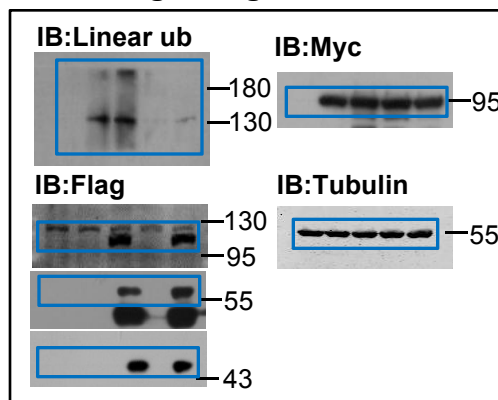

## Figure 3h

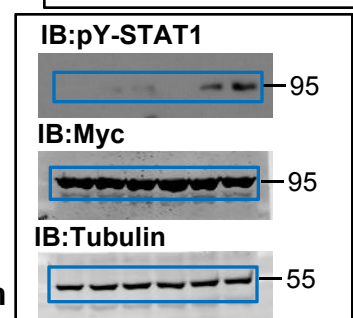

# For Figure 4

## Figure 4a

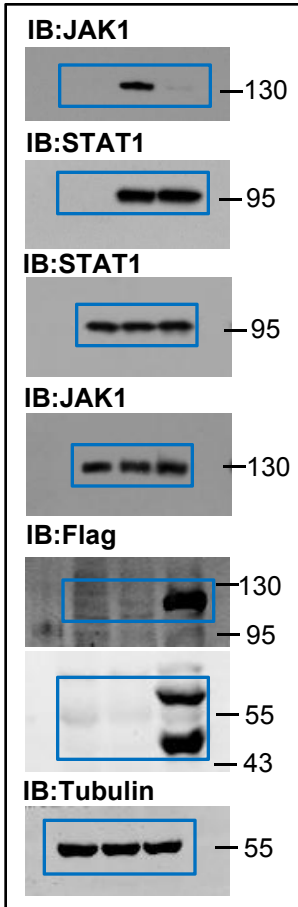

## Figure 4d

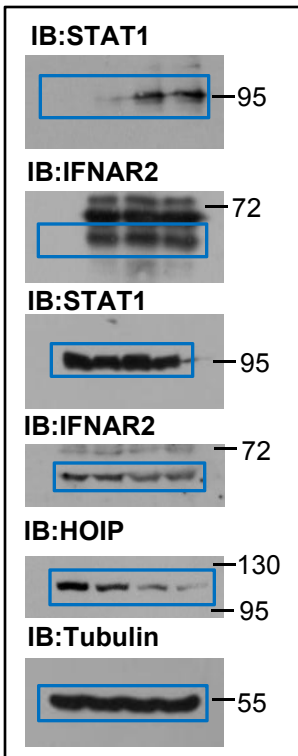

## Figure 4b

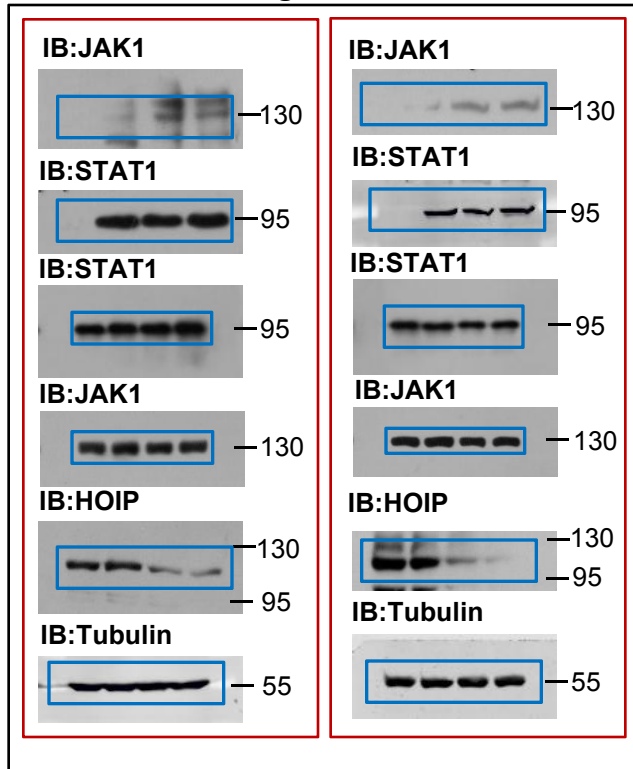

## Figure 4e

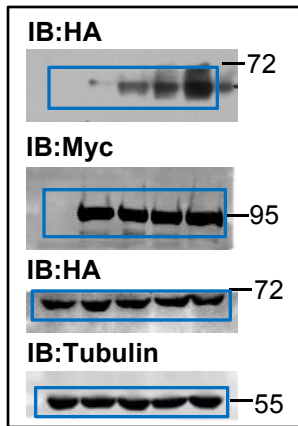

## Figure 4h

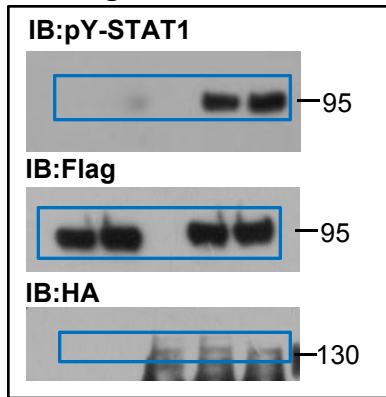

## Figure 4f

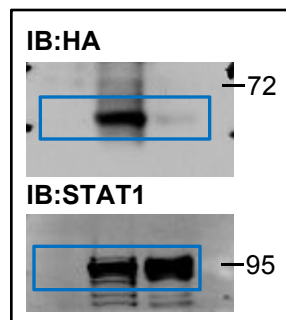

## Figure 4i

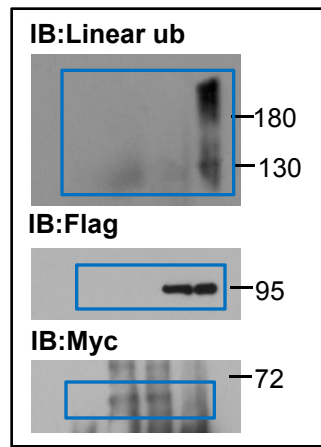

## Figure 4c

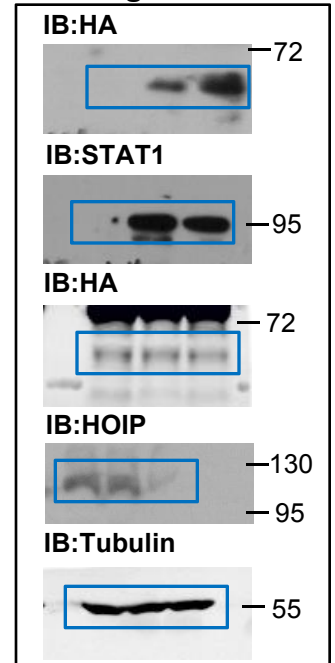

## Figure 4g

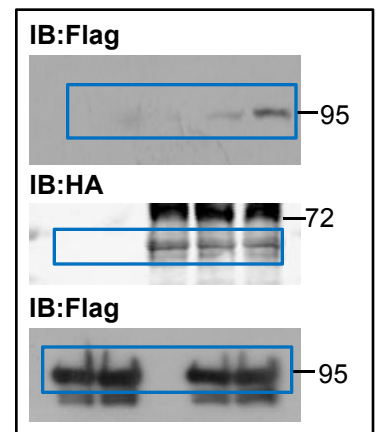

# For Figure 5

## Figure 5a

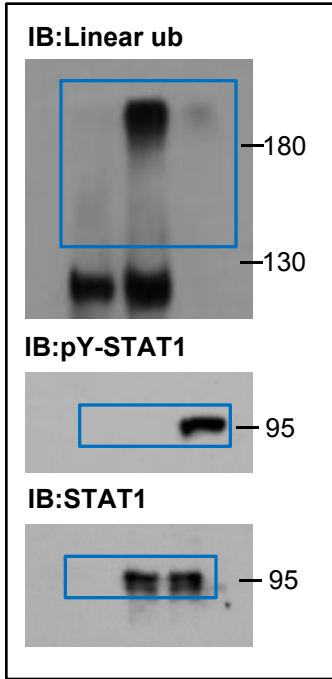

## Figure 5b

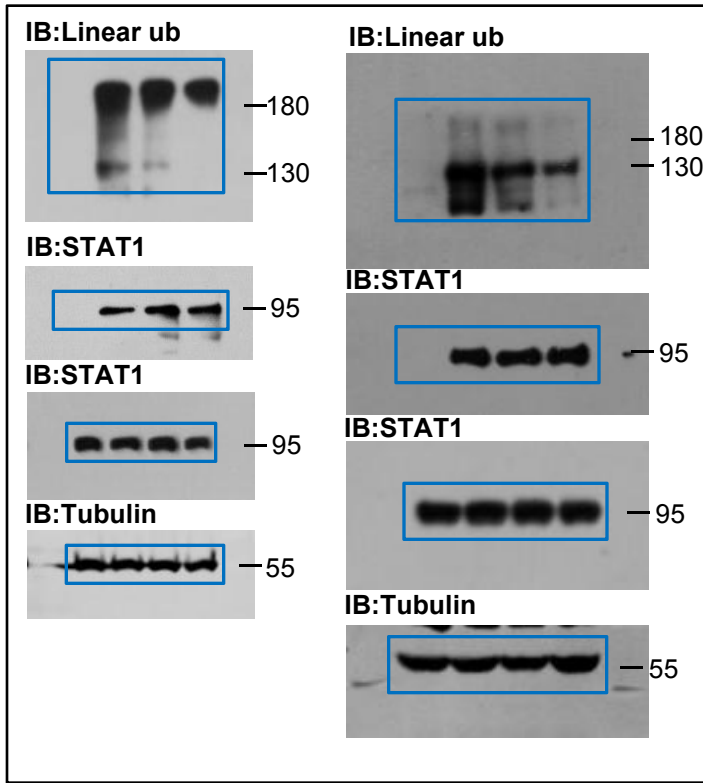

## Figure 5c

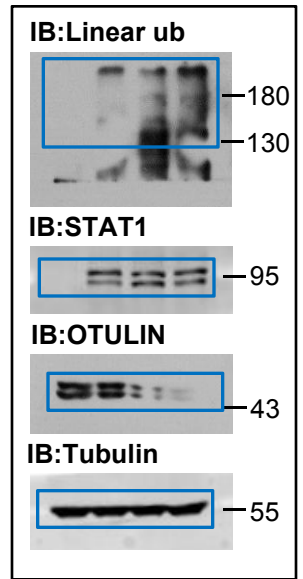

## Figure 5d

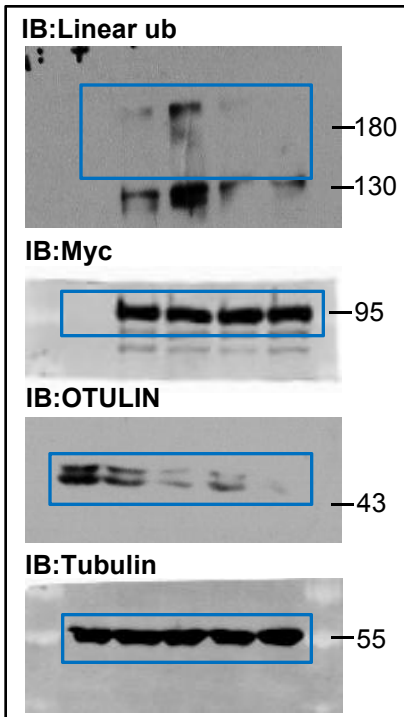

## Figure 5e

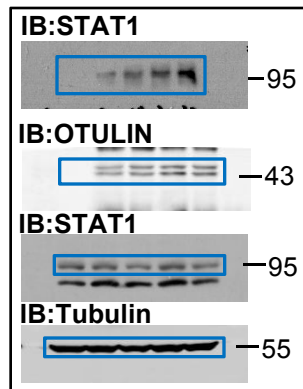

## Figure 5f

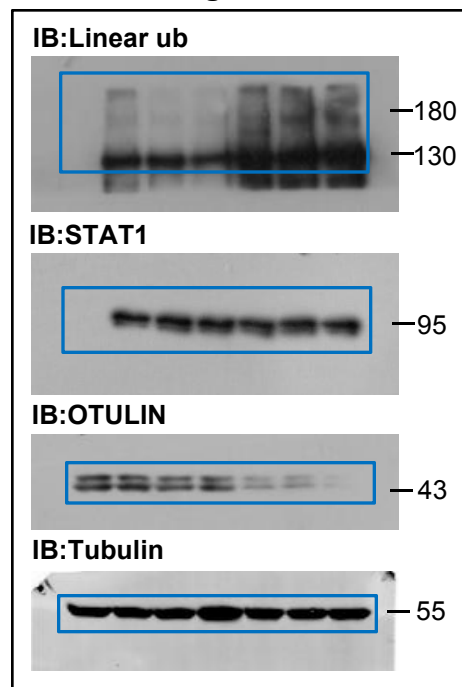

# For Figure 5

## Figure 5g

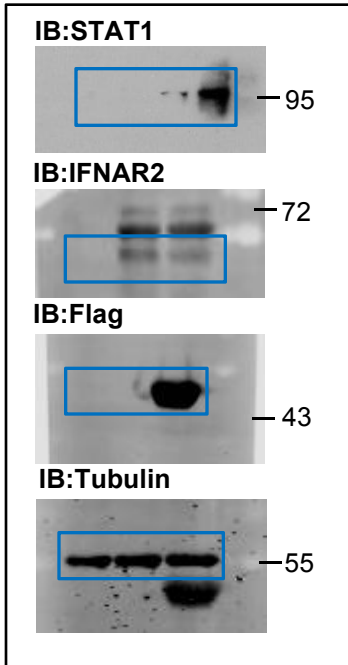

## Figure 5h

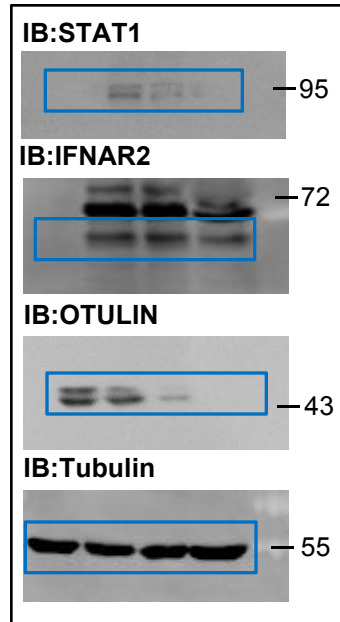

## Figure 5i

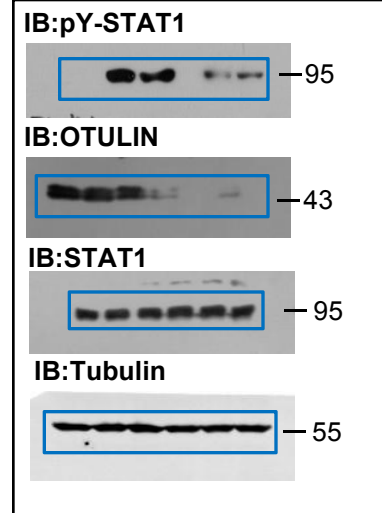

# For Figure 6

## Figure 6d

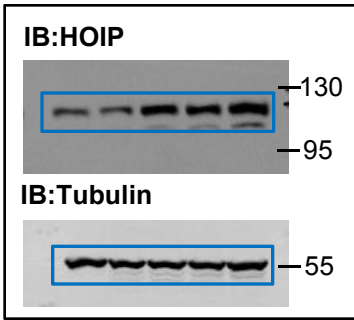

## Figure 6e

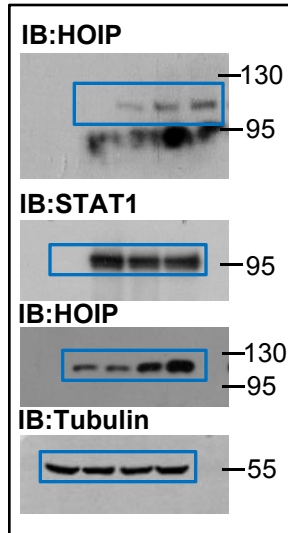

## Figure 6f

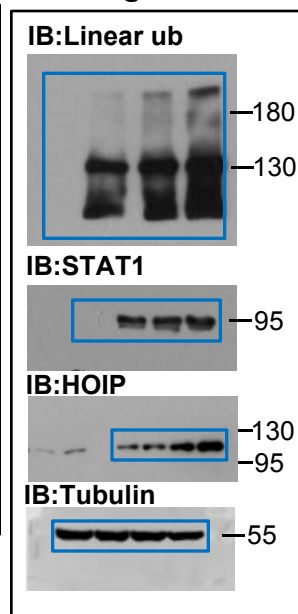

## Figure 6g

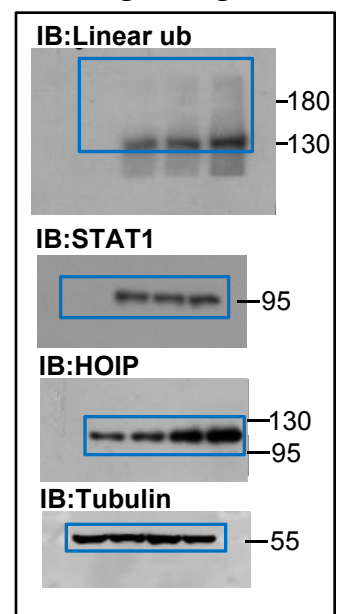

## Figure 6h

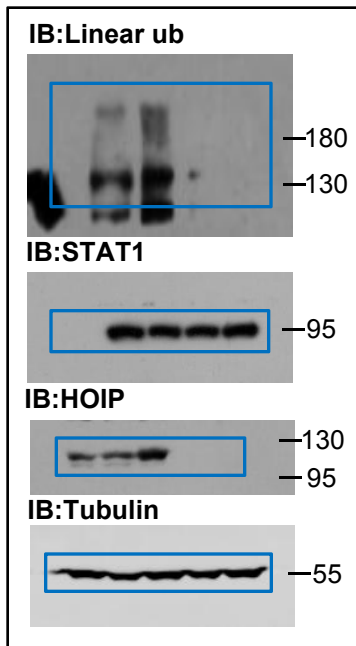

## Figure 6i

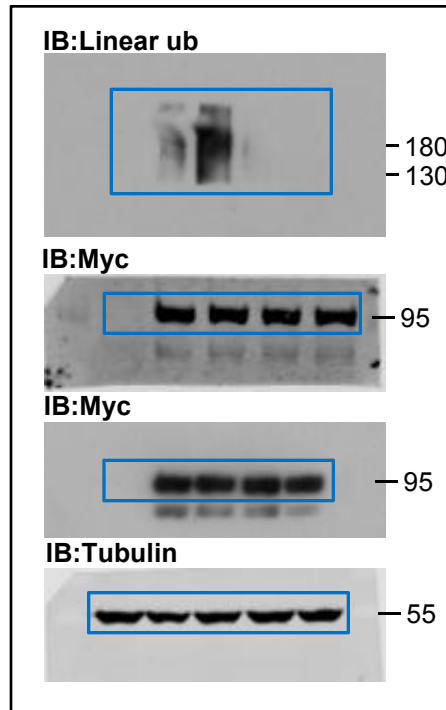

## Figure 6j

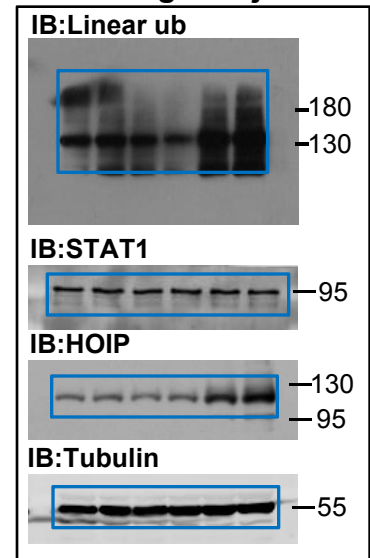

## Figure 6k

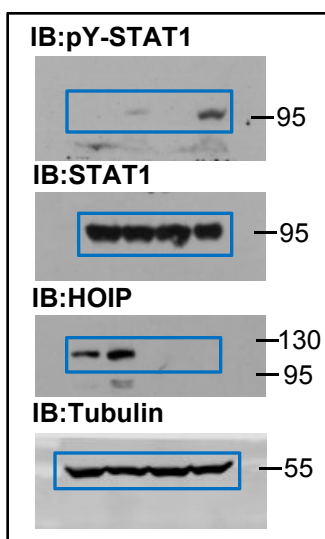

# For Figure 7

## Figure 7a

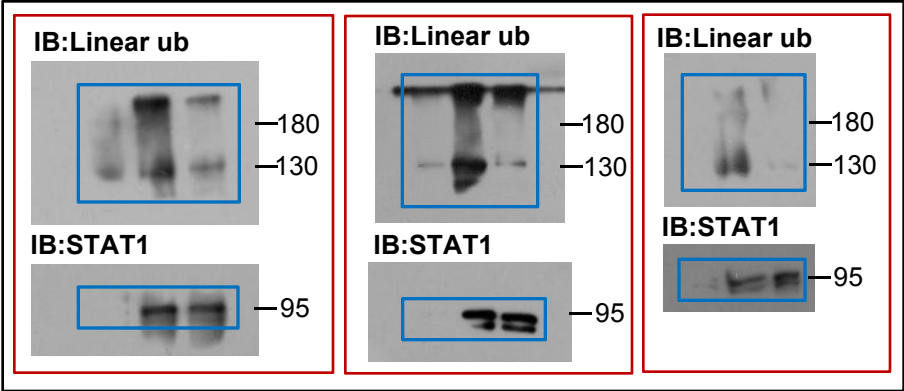

## Figure 7b

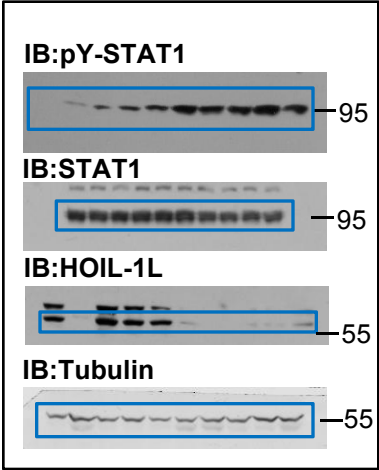

# For Figure 8

## Figure 8b

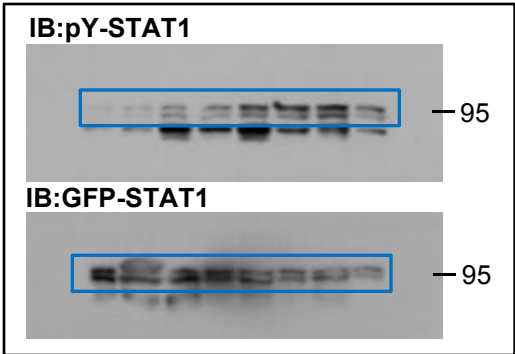

# For Supplementary Figure 1

## Figure S1b

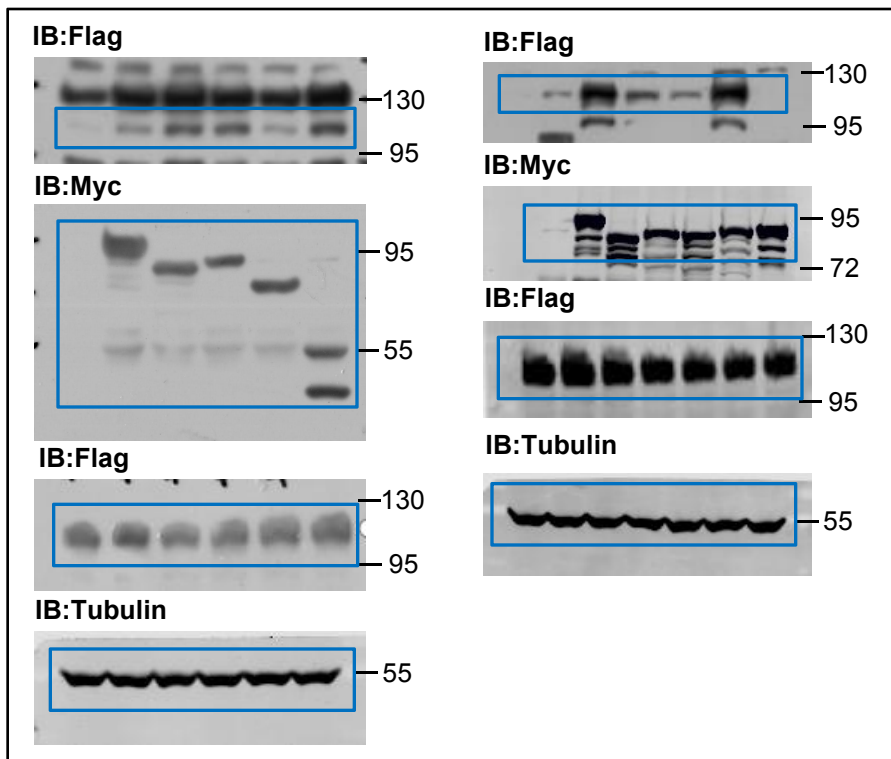

## Figure S1c

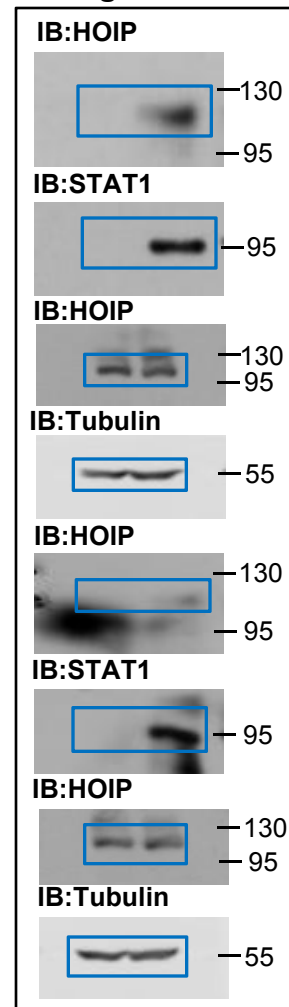

## Figure S1d

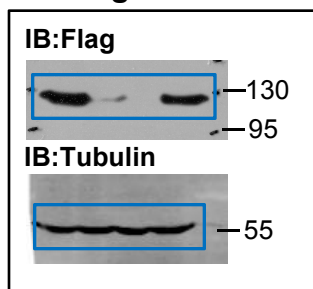

## Figure S1e

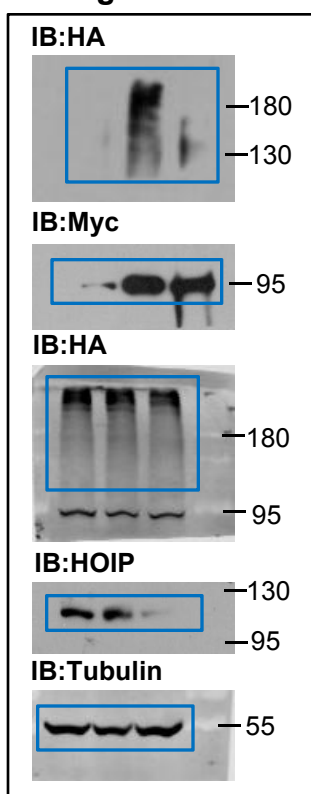

## Figure S1f

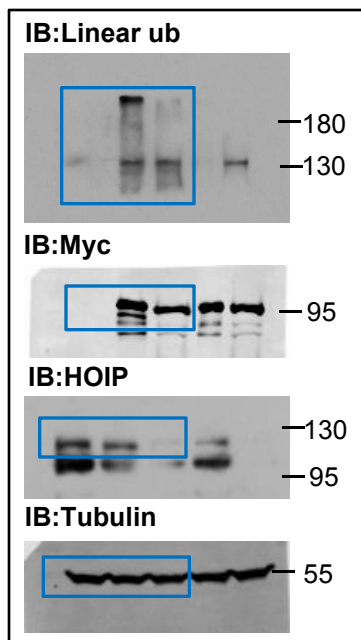

## Figure S1g

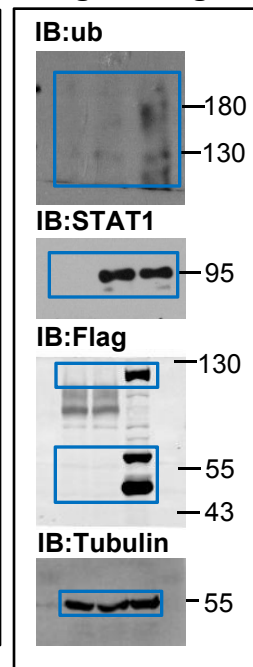



# For Supplementary Figure 2

## Figure S2b

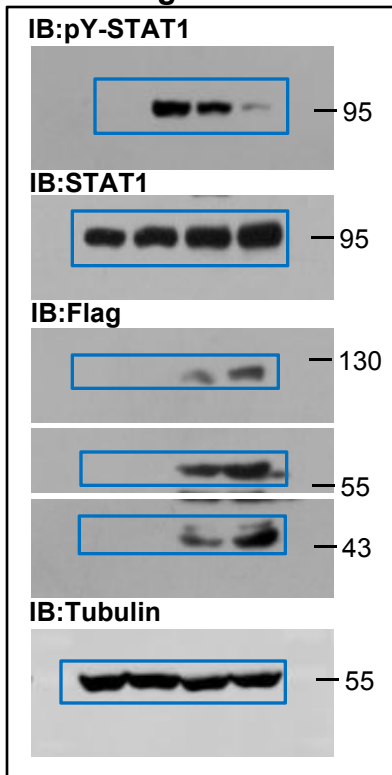

## Figure S2c

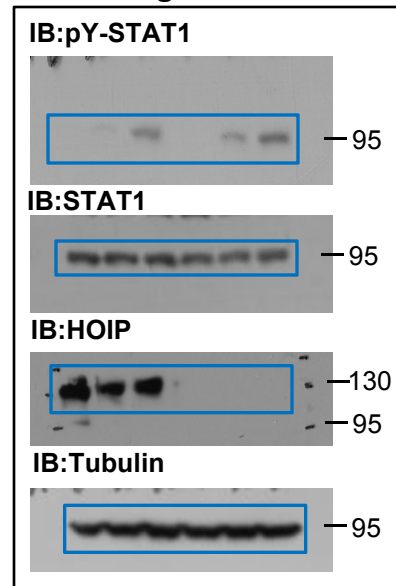

## Figure S2e

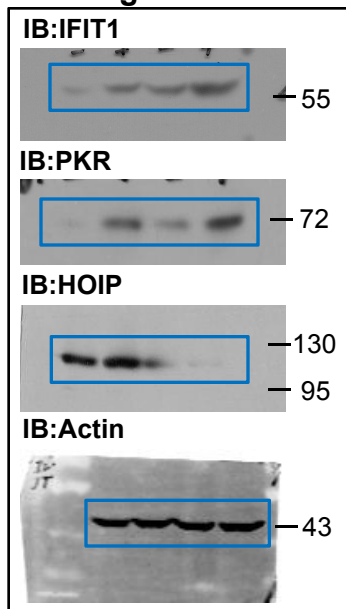

## Figure S2I

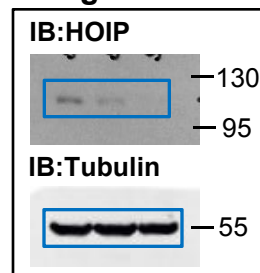

# For Supplementary Figure 3

Figure S3a

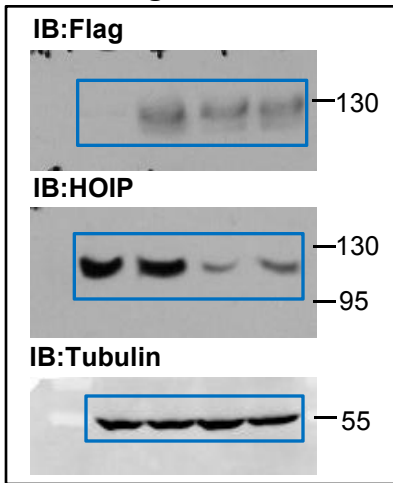

Figure S3b

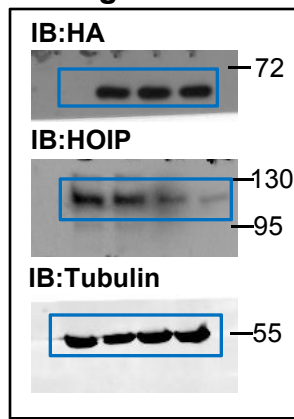

Figure S3c

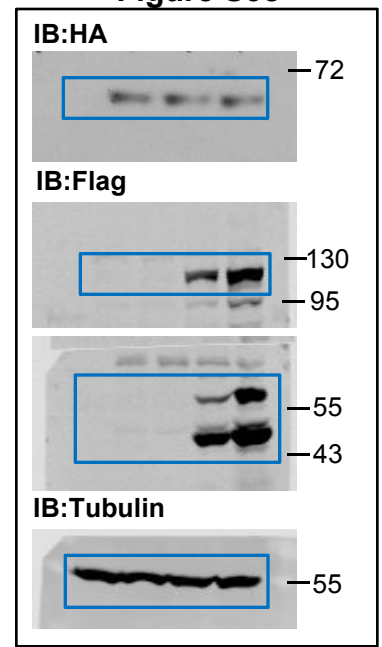

Figure S3d

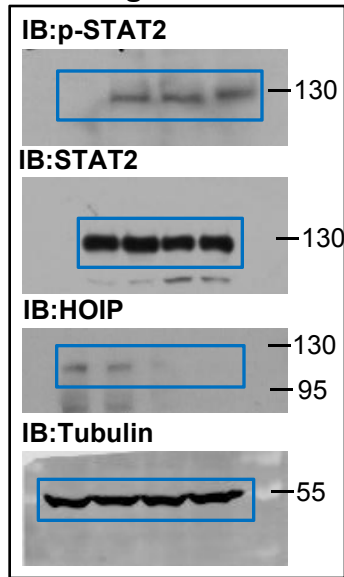

Figure S3f

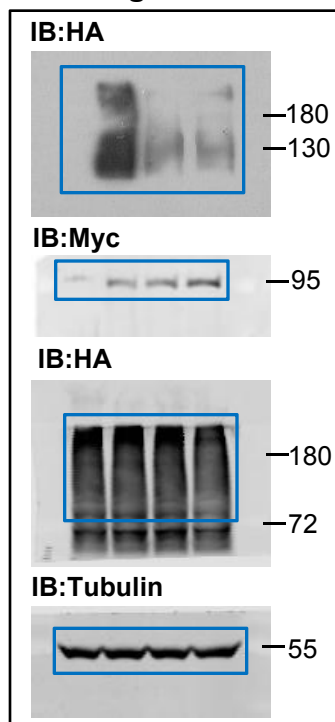

Figure S3g

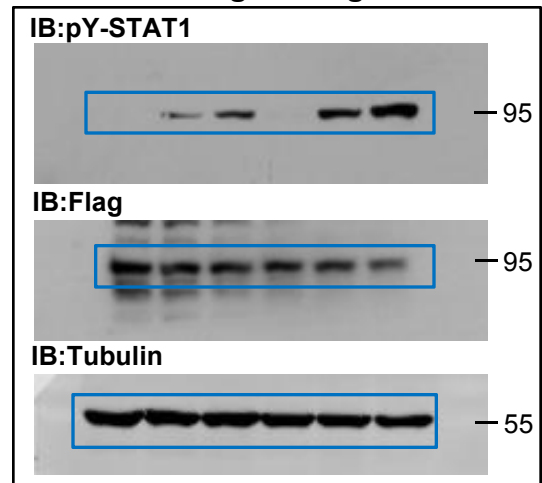

Figure S3j

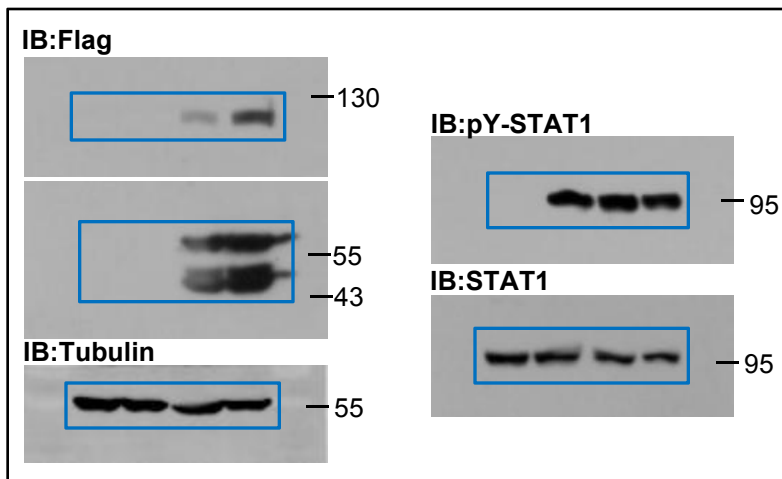

Figure S3k

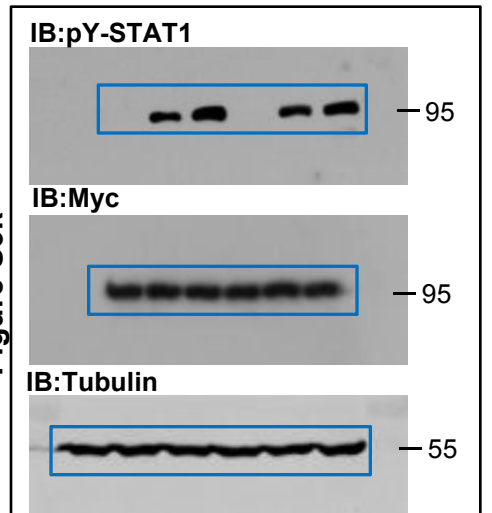

# For Supplementary Figure 4

## Figure S4a

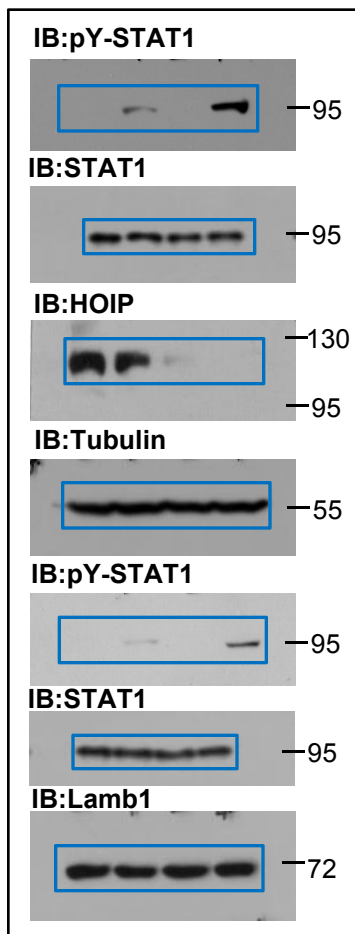

## Figure S4f

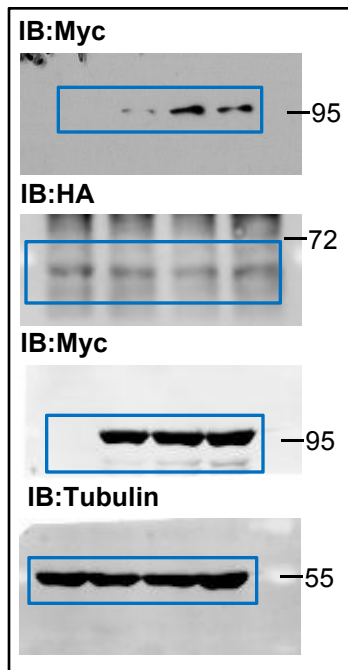

## Figure S4b

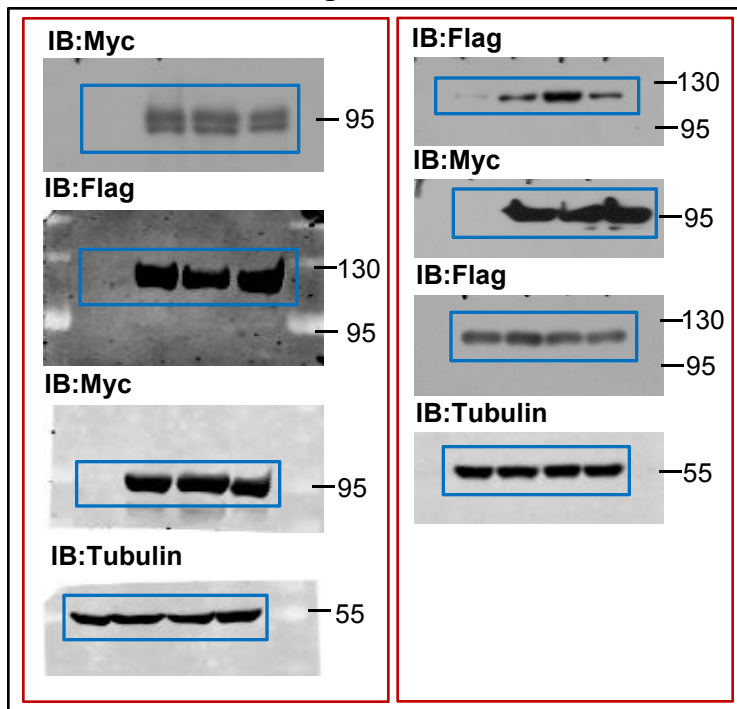

## Figure S4c

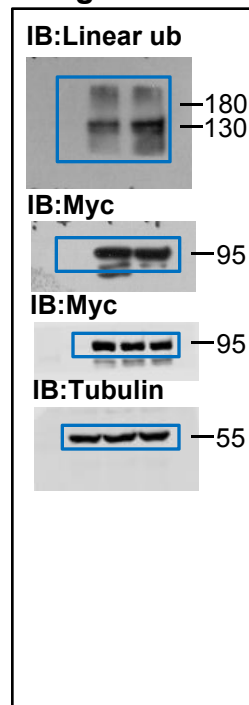

## Figure S4d

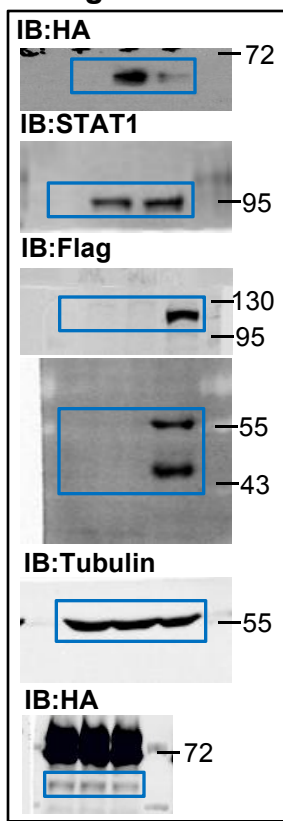

## Figure S4e

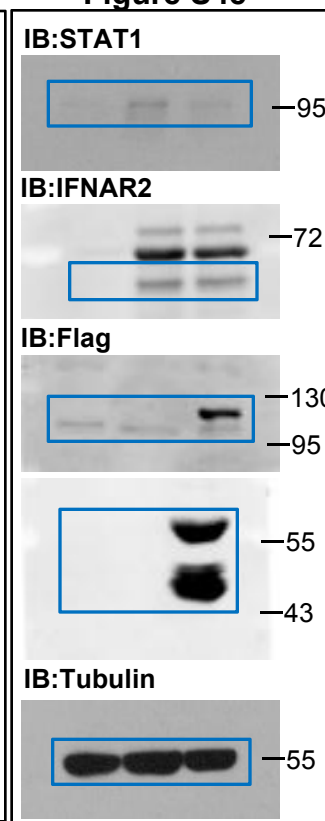

## Figure S4g

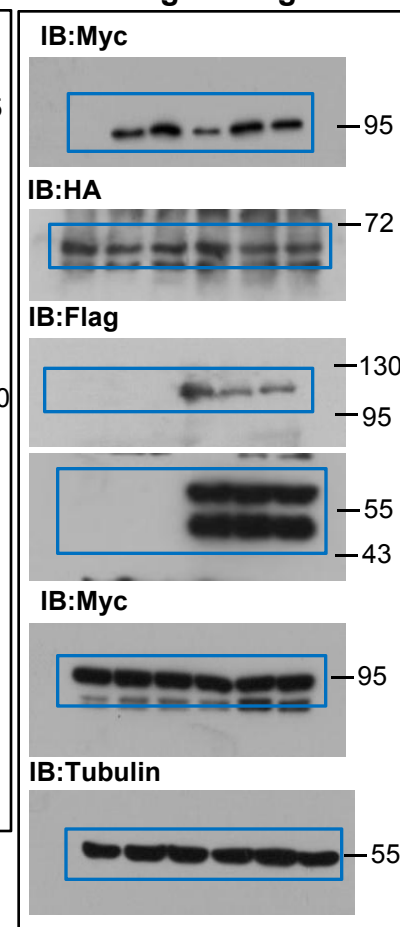

# For Supplementary Figure 5

## Figure S5a

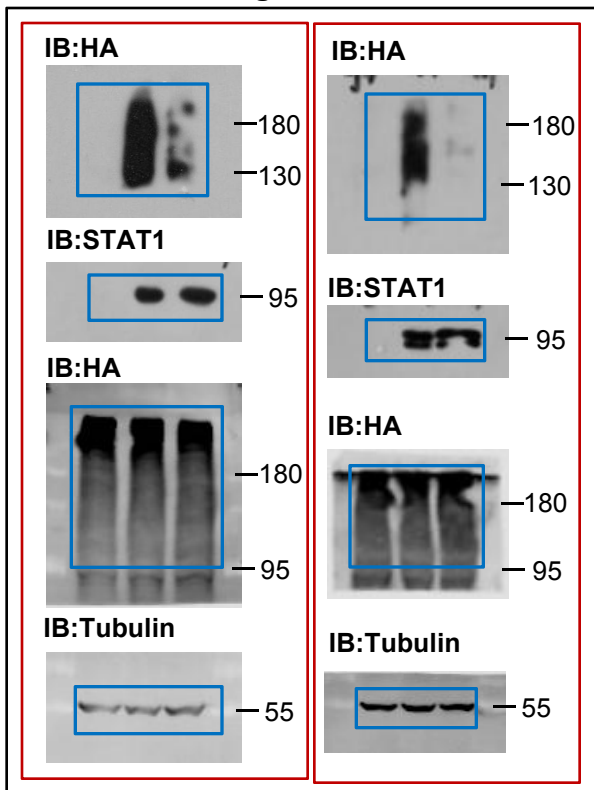

## Figure S5b

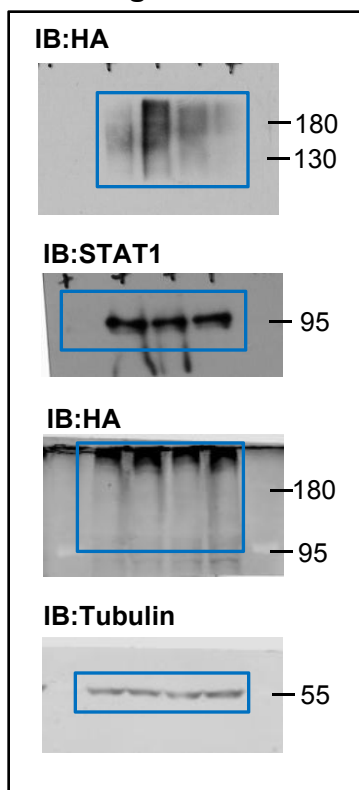

## Figure S5c

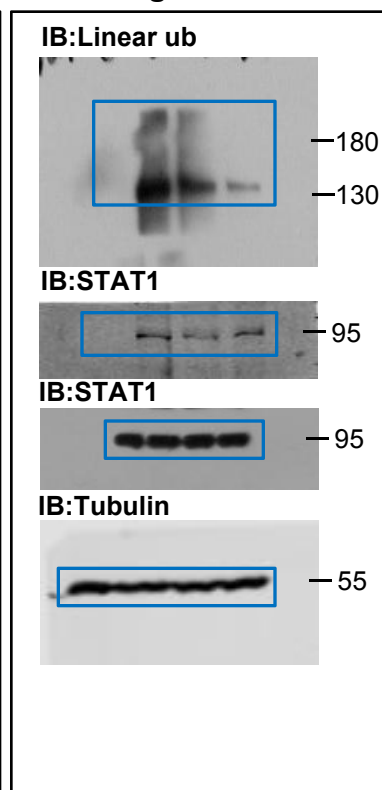

## Figure S5d

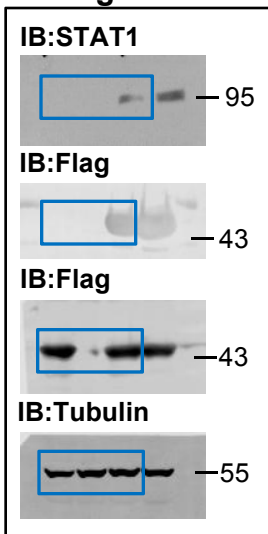

## Figure S5e

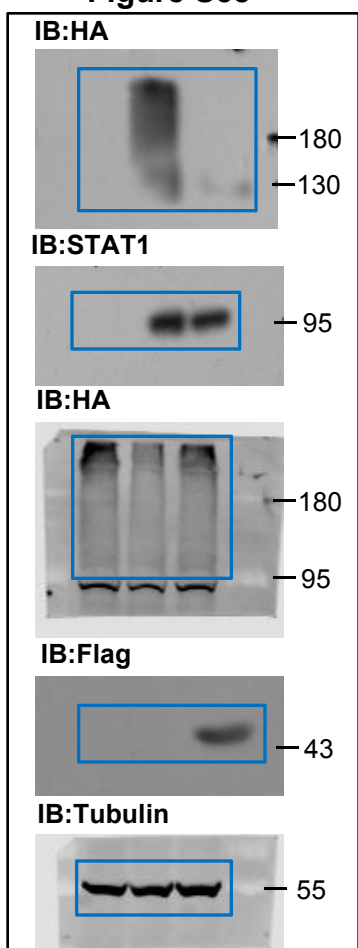

## Figure S5f

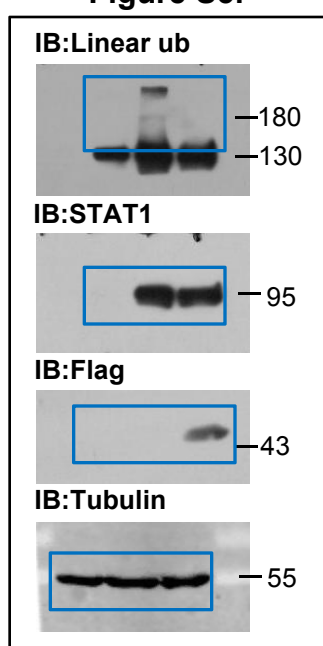

## Figure S5g

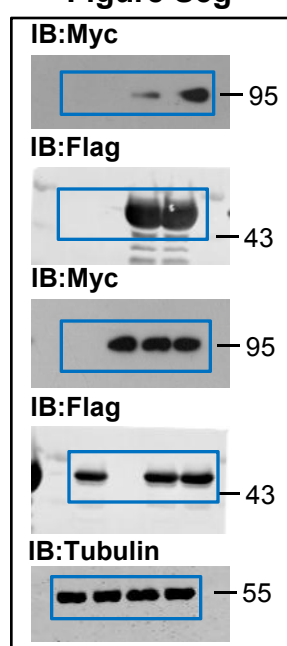

# For Supplementary Figure 5

## Figure S5h

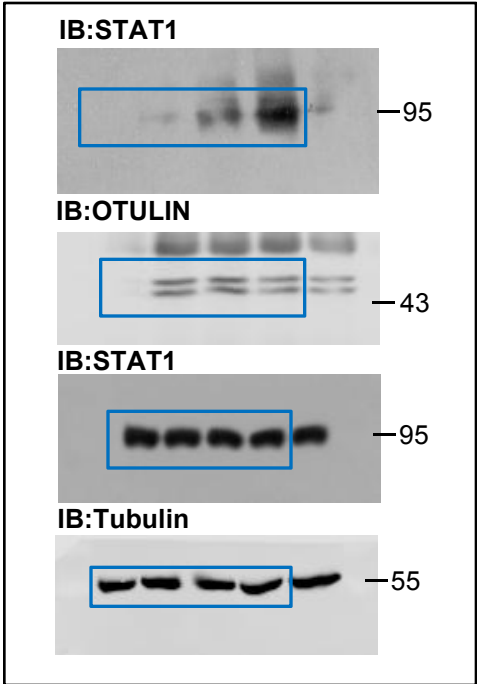

## Figure S5i

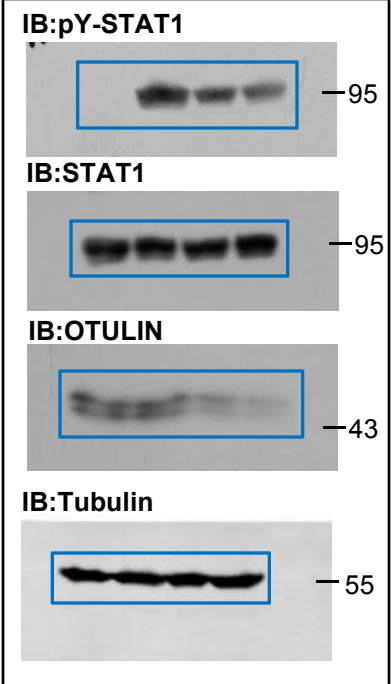

# For Supplementary Figure 6

## Figure S6a

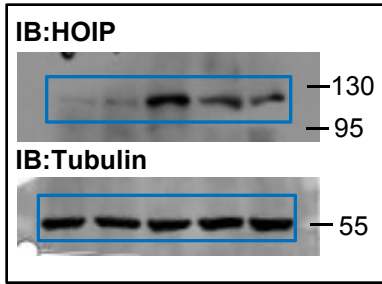

## Figure S6b

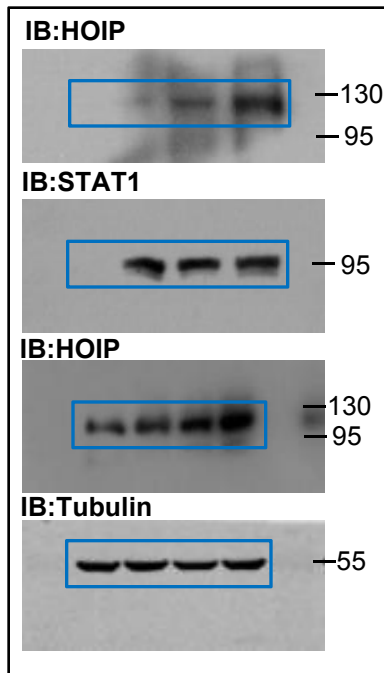

## Figure S6c

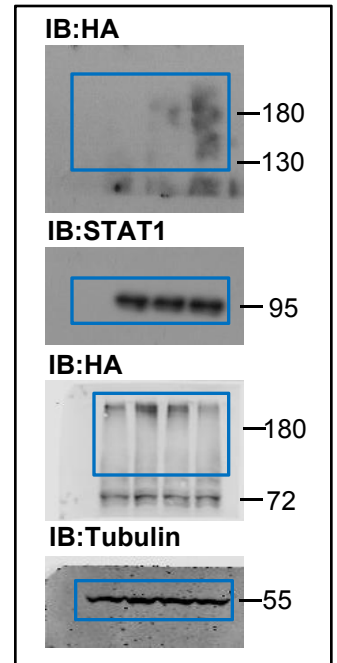

## Figure S6d

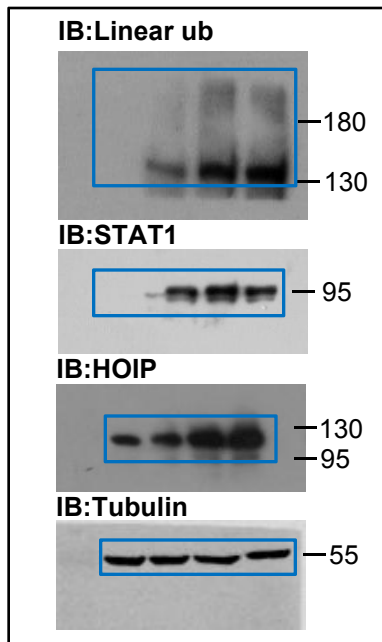

## Figure S6f

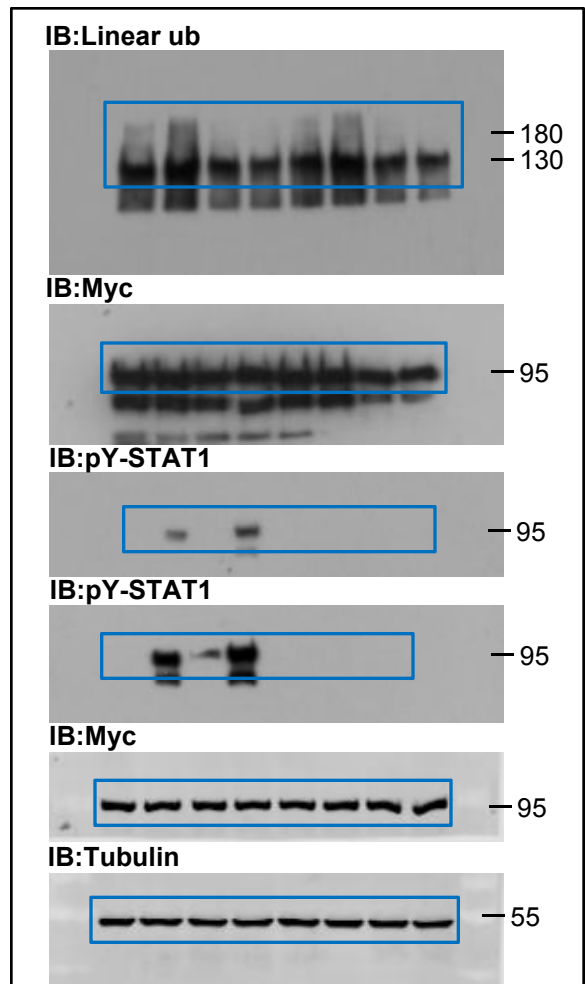

## Figure S6e

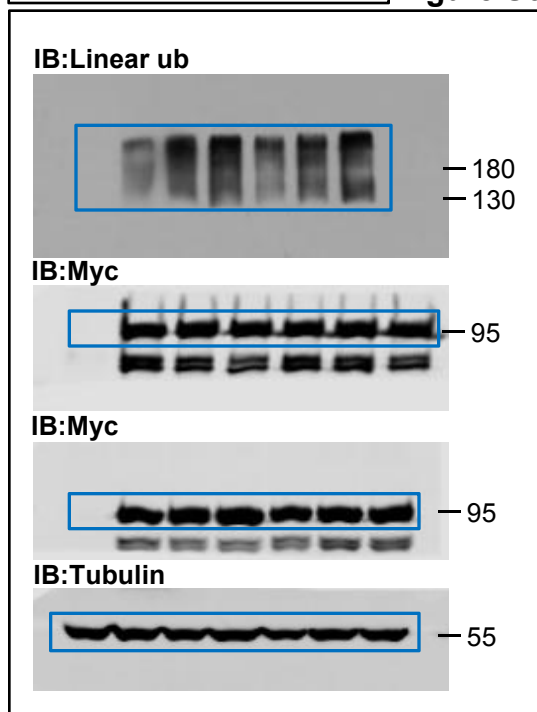

# For Supplementary Figure 7

## Figure S7a

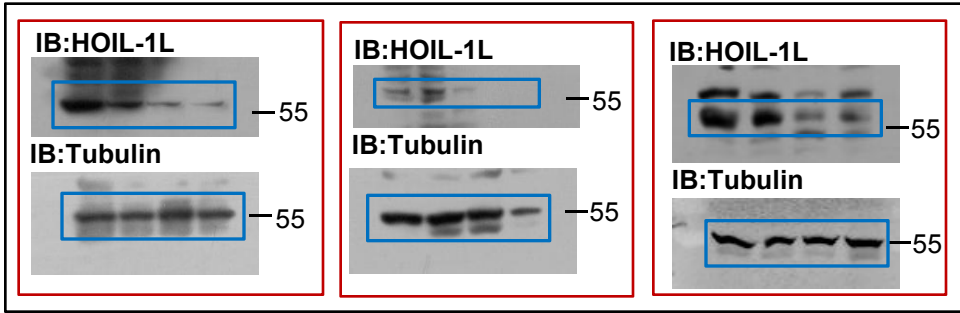

## Figure S7b

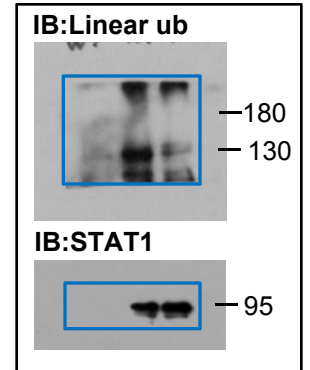

## Figure S7c

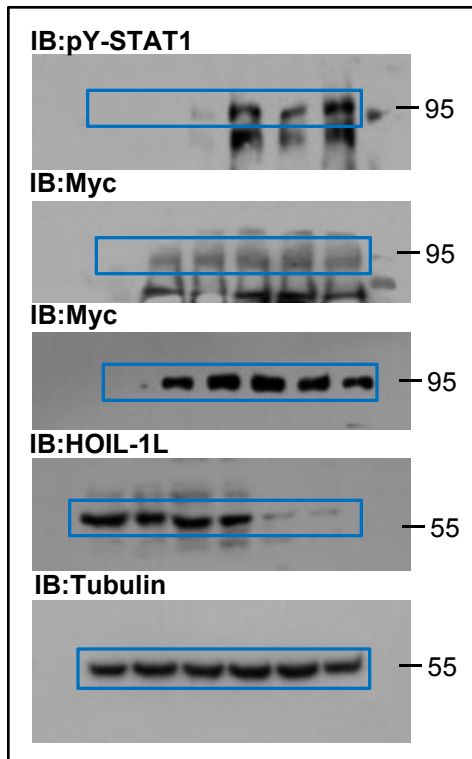

Supplement: 41467_2020_14948_MOESM1_ESM.pdf [file 41467_2020_14948_MOESM1_ESM.pdf]
