# Supplementary material for: Regulation of the linear ubiquitination of STAT1 controls antiviral interferon signaling
Source: PubMed Central journal article supplement (PMC7052135; doi:10.1038/s41467-020-14948-z), 2020-03-02
Supplement: 41467_2020_14948_MOESM3_ESM.pdf [file 41467_2020_14948_MOESM3_ESM.pdf]

Hui Zheng

x
